1 **Genetics of Cocaine and Methamphetamine**

2 **Consumption and Preference in *Drosophila melanogaster***

3  
4 Chad A. Highfill<sup>1</sup>, Brandon M. Baker<sup>1</sup>, Stephenie D. Stevens,

5 Robert R. H. Anholt<sup>1</sup> and Trudy F. C. Mackay<sup>1,2</sup>

6  
7 Department of Biological Sciences, W. M. Keck Center for Behavioral Biology, and Program in  
8 Genetics, North Carolina State University, Raleigh, NC 27695

9  
10 <sup>1</sup> Current address: Clemson Center for Human Genetics, 114 Gregor Mendel Circle,  
11 Greenwood, SC 29646.

12  
13 <sup>2</sup> Corresponding author

14 email: [tmackay@clermson.edu](mailto:tmackay@clermson.edu)

15 Tel: 864-889-0522

16  
17 Running title: Genetics of *Drosophila* drug consumption

18  
19 **Keywords:** *Drosophila melanogaster* Genetic Reference Panel; genome-wide association  
20 analysis; RNAi; genetic interaction network; mushroom bodies; dopamine

21 **ABSTRACT**

22 Illicit use of psychostimulants, such as cocaine and methamphetamine, constitutes a significant  
23 public health problem. Whereas neural mechanisms that mediate the effects of these drugs are  
24 well-characterized, genetic factors that account for individual variation in susceptibility to  
25 substance abuse and addiction remain largely unknown. *Drosophila melanogaster* can serve as  
26 a translational model for studies on substance abuse, since flies have a dopamine transporter  
27 that can bind cocaine and methamphetamine, and exposure to these compounds elicits effects  
28 similar to those observed in people, suggesting conserved evolutionary mechanisms underlying  
29 drug responses. Here, we used the *D. melanogaster* Genetic Reference Panel to investigate the  
30 genetic basis for variation in psychostimulant drug consumption, to determine whether similar or  
31 distinct genetic networks underlie variation in consumption of cocaine and methamphetamine,  
32 and to assess the extent of sexual dimorphism and effect of genetic context on variation in  
33 voluntary drug consumption. Quantification of natural genetic variation in voluntary  
34 consumption, preference, and change in consumption and preference over time for cocaine and  
35 methamphetamine uncovered significant genetic variation for all traits, including sex-, exposure-  
36 and drug-specific genetic variation. Genome wide association analyses identified both shared  
37 and drug-specific candidate genes, which could be integrated in genetic interaction networks.  
38 We assessed the effects of ubiquitous RNA interference (RNAi) on consumption behaviors for  
39 34 candidate genes: all affected at least one behavior. Finally, we utilized RNAi knockdown in  
40 the nervous system to implicate dopaminergic neurons and the mushroom bodies as part of the  
41 neural circuitry underlying experience-dependent development of drug preference.

42

43 **AUTHOR SUMMARY**

44 Illicit use of cocaine and methamphetamine is a major public health problem. Whereas the  
45 neurological effects of these drugs are well characterized, it remains challenging to determine  
46 genetic risk factors for substance abuse in human populations. The fruit fly, *Drosophila*  
47 *melanogaster*, presents an excellent model for identifying evolutionarily conserved genes that  
48 affect drug consumption, since genetic background and exposure can be controlled precisely. We  
49 took advantage of natural variation in a panel of inbred wild derived fly lines with complete genome  
50 sequences to assess the extent of genetic variation among these lines for voluntary consumption  
51 of cocaine and methamphetamine and to explore whether some genetic backgrounds might show  
52 experience-dependent development of drug preference. The drug consumption traits were highly  
53 variable among the lines with strong sex-, drug- and exposure time-specific components. We  
54 identified candidate genes and gene networks associated with variation in consumption of cocaine  
55 and methamphetamine and development of drug preference. Using tissue-specific suppression  
56 of gene expression, we were able to functionally implicate candidate genes that affected at least  
57 one consumption trait in at least one drug and sex. In humans, the mesolimbic dopaminergic  
58 projection plays a role in drug addiction. We asked whether in *Drosophila* the mushroom bodies  
59 could play an analogous role, as they are integrative brain centers associated with experience-  
60 dependent learning. Indeed, our results suggest that variation in consumption and development  
61 of preference for both cocaine and methamphetamine is mediated, at least in part, through a  
62 neural network that comprises dopaminergic projections to the mushroom bodies.

63

## 65 INTRODUCTION

66 Illicit use of cocaine and methamphetamine constitutes a significant public health problem that  
67 incurs great socioeconomic costs in the United States and worldwide [1-3]. Cocaine and the  
68 amphetamine class of drugs are potent central nervous system stimulants that act by raising  
69 synaptic concentrations of biogenic amines. Cocaine inhibits neurotransmitter reuptake at  
70 dopaminergic, serotonergic and noradrenergic synapses [4,5]. Amphetamine increases  
71 neurotransmission by promoting the release of dopamine from presynaptic vesicles through its  
72 actions on the vesicular monoamine transporter and subsequent reverse flux of dopamine via  
73 the dopamine transporter and through the plasma membrane into the synaptic cleft [6,7].

74 Amphetamine, methamphetamine, and methylphenidate are used clinically to treat  
75 attention deficit hyperactivity disorder and narcolepsy. Long term use of these compounds,  
76 however, can lead to addiction, and ultimately death [8]. The addictive properties of these drugs  
77 are mediated through the dopaminergic mesolimbic reward pathway, which projects from the  
78 ventral tegmental area via the nucleus accumbens to prefrontal cortex [9]. Although most  
79 studies on psychostimulants focus on addiction, addiction represents only one facet of the  
80 diverse organismal effects that result from psychostimulant drug abuse. These drugs exert a  
81 wide range of physiological and behavioral effects, including suppression of appetite, which can  
82 result in malnutrition, and severe cardiovascular, respiratory and renal disorders. Use of cocaine  
83 and amphetamine can also cause mental disorders, including paranoia, anxiety, and psychosis  
84 [10,11].

85 Susceptibility to the effects of cocaine and methamphetamine is likely to vary among  
86 individuals and be determined both by environmental and genetic factors. However, there is  
87 limited information regarding the genetic basis of susceptibility to the effects of these drugs in  
88 human populations [12]. Twin and adoption studies have focused primarily on alcohol abuse  
89 and illicit drugs, such as cannabis, with heritability estimates ranging from ~30-70% [13,14].  
90 Most studies on psychostimulant addiction to date have centered on candidate genes

91 associated with neurotransmission in the mesolimbic projection [12], and many of these are  
92 inconclusive or contradictory. For example, some studies reported that alleles of the dopamine  
93 D2 receptor were associated with substance abuse [15-18], whereas others did not replicate  
94 this finding [19-24]. Similar contradictory results have been obtained for association analyses  
95 between polymorphisms in the dopamine transporter gene and cocaine-related phenotypes [24-  
96 28]. These contradictory findings may be due in part to failure to account for multiple testing or  
97 population structure [29]. However, genetic studies of substance abuse and addiction in human  
98 populations are challenging due to diverse social conditions and physical environments,  
99 confounding factors with comorbid conditions such as alcoholism or psychiatric disorders, and  
100 difficulty to recruit large numbers of study subjects due to criminalization.

101 *Drosophila melanogaster* is an excellent model for identifying genes that affect drug  
102 consumption behaviors since both the genetic background and environment, including exposure  
103 to drugs, can be controlled precisely. These results have translational potential since 75% of  
104 disease-causing genes in humans have a fly ortholog [30]. High resolution X-ray crystallography  
105 has shown that the *D. melanogaster* dopamine transporter has a central conformationally pliable  
106 binding site that can accommodate cocaine, methamphetamine and their closely related  
107 analogues [31]. Similar to its effects in humans, methamphetamine suppresses sleep, causes  
108 arousal and suppresses food intake in flies [32-34]. In addition, cocaine, amphetamine and  
109 methylphenidate exert quantifiable locomotor effects in flies [35-41]. Thus, despite profound  
110 differences between the neuroanatomical organization of the fly and vertebrate brains, it is likely  
111 that behavioral and physiological effects of methamphetamine and cocaine are mediated, at  
112 least in part, by evolutionarily analogous mechanisms.

113 Here, we used the inbred, sequenced lines of the *D. melanogaster* Genetic Reference  
114 Panel (DGRP [42,43]) to investigate the genetic basis for variation in psychostimulant drug  
115 consumption. We used a two-capillary Capillary Feeding (CAFE) assay [44-46] to quantify  
116 voluntary consumption, preference and change of consumption and preference over time for

117 cocaine and methamphetamine. Since cocaine and methamphetamine both target  
118 dopaminergic synaptic transmission, but through different mechanisms, we asked to what extent  
119 genetic networks that underlie variation in consumption of cocaine and methamphetamine  
120 incorporate the same or different genes. We also sought to determine the extent of sexual  
121 dimorphism for naïve and experience-dependent voluntary drug intake. In addition, we asked  
122 how much variation in voluntary drug consumption exists among different DGRP lines and what  
123 fraction of that variation is accounted for by genetic variation. We showed that there is naturally  
124 occurring genetic variation for all drug consumption traits with strong sex-, drug- and exposure  
125 time-specific components. We performed genome wide association (GWA) analyses to identify  
126 candidate genes associated with the drug consumption behaviors that could be mapped to a  
127 genetic interaction network. We tested the effects of RNAi mediated suppression of gene  
128 expression [47] on all consumption behaviors for 34 candidate genes and found that all affected  
129 at least one behavior in at least one drug and sex. Finally, we used RNAi to suppress gene  
130 expression in neurons, glia, the mushroom bodies and dopaminergic neurons in a subset of  
131 genes and showed that innate preference and the development of preference for  
132 psychostimulant drugs involves dopaminergic neurons and the mushroom bodies, neural  
133 elements associated with experience-dependent modulation of behavior.

134

## 135 **RESULTS**

### 136 **Quantitative genetic analysis of drug consumption behaviors in the DGRP**

137 We used a two-capillary CAFE assay [44-46] to enable flies to choose to consume either  
138 sucrose or sucrose supplemented with 0.2 mg/ml cocaine (or 0.5 mg/ml methamphetamine),  
139 analogous to the two-bottle choice assay used in rodent studies [48] (Fig.1). We quantified  
140 consumption for three consecutive days for males and females from each of 46 DGRP lines that  
141 were unrelated, free of chromosomal inversions, and free of infection with the endosymbiont  
142 *Wolbachia pipientis* [43; Table S1]. These data enabled us to assess whether there is naturally

143 occurring genetic variation in this population for naïve consumption of each solution and  
144 preference, and change of consumption and preference upon repeated exposures (*i.e.*,  
145 experience-dependent modification of behavior).

146 We performed four-way mixed model analyses of variance (ANOVA) to partition variation  
147 in consumption between DGRP lines, males and females, drug vs. sucrose, and the three  
148 exposures. All main effects were significant for both drugs (Table 1), indicating genetic variation  
149 for consumption, difference between amount of sucrose and drug consumed, sexual  
150 dimorphism, and experience-dependent modulation of behavior. We are most interested in the  
151 two- and three-way interaction terms involving Line, as they indicate genetic variation in sexual  
152 dimorphism ( $L \times X$ ), change of consumption between exposures ( $L \times E$ ), preference for sucrose or  
153 drug solution ( $L \times S$ ), and change of preference for sucrose or drug between exposures ( $L \times E \times S$ ).  
154 With the exception of  $L \times S$ , these interaction terms were significant for both the cocaine and  
155 methamphetamine analyses (Table 1).

156 We next performed reduced ANOVA models to quantify broad sense heritabilities ( $H^2$ )  
157 for consumption and change in consumption traits (Table S2). We found significant genetic  
158 variation in consumption of both drugs and sucrose alone within each sex and exposure, with  $H^2$   
159 ranging between 0.20 and 0.38 for cocaine consumption and between 0.22 and 0.30 for  
160 methamphetamine consumption (Fig. 2, Table S2). Further, there was significant genetic  
161 variation for the change in consumption of sucrose alone or drug in both sexes between the  
162 third and first exposures, with  $H^2$  ranging between 0.14 and 0.18 for cocaine and between 0.17  
163 and 0.22 for methamphetamine (Fig. 2, Table S2). Thus, there is genetic variation for both  
164 consumption and experience-dependent consumption of both drugs and sucrose alone in the  
165 DGRP.

166 Finally, we defined preference in two ways: as the difference between amount of drug  
167 and sucrose alone consumed (Preference A), and as this difference scaled by the total amount  
168 of both solutions consumed (Preference B). Preference values of 0 indicate equal consumption

169 of sucrose alone and sucrose containing drug; values  $> 0$  represent preference for the drug and  
170 values  $< 0$  indicate drug avoidance. Both preference metrics were significantly genetically  
171 variable for each sex and exposure for cocaine, with  $H^2$  ranging from 0.06-0.16; while for  
172 methamphetamine, both preference metrics were significantly genetically variable in females for  
173 all exposures ( $H^2$  from 0.05-0.18) and for males in the second and third exposures ( $H^2$  from  
174 0.08-0.11) (Table S2). For cocaine, the difference in preference A between exposures 3 and 1  
175 was significant only in females ( $H^2 = 0.11$ ) while the difference in Preference B was significant  
176 for females ( $H^2 = 0.13$ ) and males ( $H^2 = 0.05$ ). For methamphetamine, the difference in  
177 Preference A was significant in males ( $H^2 = 0.04$ ) and the difference in Preference B was  
178 significant in females ( $H^2 = 0.04$ ) (Table S2). Thus, there is genetic variation for both innate drug  
179 preference and experience-dependent drug preference in the DGRP.

180         The heritabilities of consumption traits are low, as is typical for behavioral traits,  
181 indicating that environmental factors, including previous experience, predominantly contribute to  
182 the observed phenotypic variation. The advantage of performing multiple replicate  
183 measurements of each DGRP line is that the broad sense heritabilities of line means (Table S3)  
184 used in the GWA analyses (see below) are much greater than heritabilities based on individual  
185 vial replicates (Table S2).

186         We computed the genetic and phenotypic correlations between males and females for  
187 the consumption behaviors, between exposures for consumption and preference, and between  
188 solutions (Table S4). Cross-sex genetic correlations for consumption tended to decrease with  
189 the number of exposures for both cocaine and methamphetamine, suggesting that the  
190 experience-dependent modification of consumption is sex-specific. Consumption of drugs and  
191 sucrose is highly correlated across the three exposures (albeit significantly different from unity),  
192 while the correlations of drug preference across exposures are low to moderate for both cocaine  
193 and methamphetamine in both sexes. Although the consumption of drugs and sucrose for  
194 cocaine and methamphetamine are genetically and phenotypically correlated in both sexes,



195 preference for the two drugs is not significantly correlated. Finally, Preference A and Preference  
196 B within each exposure are nearly perfectly correlated, as expected since the difference in  
197 consumption is in both metrics.

198 In summary, we found that there is extensive genetic variation in consumption and  
199 preference as well as change in consumption and preference with repeated exposures for both  
200 cocaine and methamphetamine across different genetic backgrounds, and that genetic variation  
201 for these traits has significant sex- and drug-specific components.

202

### 203 **Genome wide association analyses of drug consumption in the DGRP**

204 Our quantitative genetic analyses of consumption in the DGRP indicate that there is genetic  
205 variation for all traits assessed, and that the traits have a complex correlation structure  
206 indicating partially common and partially distinct genetic bases. Therefore, we performed single  
207 variant GWA analyses for 12 traits (drug and sucrose consumption exposure 1, drug and  
208 sucrose consumption exposure 3, change in drug and sucrose consumption, preference A  
209 exposure 1, preference A exposure 3, preference B exposure 1, preference B exposure 3,  
210 change in preference A, and change in preference B) for cocaine and methamphetamine,  
211 separately for males and females. We performed association tests for 1,891,456 DNA sequence  
212 variants present in the 46 DGRP lines with minor allele frequencies greater than 0.05 [43].

213 At a lenient significance threshold of  $P < 5 \times 10^{-5}$ , we identified 1,441 polymorphisms in  
214 or near (within 1 kb of the start and end of the gene body) 725 genes for all consumption  
215 behaviors related to cocaine, and 1,413 polymorphisms in or near 774 genes for  
216 methamphetamine exposure (Table S5). The majority of these variants had sex-specific effects.  
217 A total of 40 variants and 141 genes overlapped between cocaine and methamphetamine. The  
218 variants in or near genes implicate candidate genes affecting consumption behaviors, while the  
219 intergenic variants could potentially contain regulatory motifs for transcription factor-binding  
220 sites or chromatin structure regulating these traits. Only two variants are formally significant

221 following a Bonferroni correction for multiple tests ( $P < 2.64 \times 10^{-8}$ ). *2L\_10179155\_SNP* is  
222 located within an intronic region in *CG44153* and affects experience-dependent development of  
223 methamphetamine preference in both sexes. Its human homolog *ADGRB3* encodes a G-protein  
224 coupled receptor, which contributes to the formation and maintenance of excitatory synapses  
225 [49] and has been implicated in GWA studies on human addiction [50]. *3R\_27215016\_SNP* is a  
226 synonymous SNP in the coding sequence of *CG1607* and affects naïve consumption of  
227 sucrose. *CG1607* encodes an amino acid transmembrane transporter. One of its human  
228 orthologs, *SLC7A5*, is an amino acid transporter, mutations in which are associated with autism  
229 spectrum disorder and defects in motor coordination [51].

230 While not formally significant, we identified genes previously associated with cocaine-  
231 related behaviors (*Bx* [*Lmo*], *loco*, *Tao*) and ethanol-related behaviors (*Bx*, *DopR*, *Egfr*, *hppy*,  
232 *Tao*, *Tbh*) [52] in *D. melanogaster*. In addition, the genes implicated by the GWA analyses are  
233 enriched for multiple gene ontology (GO) categories and pathways [53,54] at a false discovery  
234 rate  $< 0.05$  (Table S5). GO terms involved in nervous system development and function were  
235 among the most highly enriched, consistent with the known neurobiological mechanisms of  
236 action of these drugs. Finally, we note that  $\sim 70\%$  of the candidate genes from the GWA  
237 analyses have human orthologs, and many of these genes have previously been associated  
238 with cocaine or methamphetamine abuse in humans or with behaviors associated with intake  
239 and response to various psychoactive substances (alcohol, cannabis, nicotine, opioids) in  
240 humans as well as zebrafish, mouse and rat models (Table S6). This suggests that cocaine and  
241 methamphetamine exert their effects in flies and humans through evolutionarily conserved  
242 neural mechanisms.

243 These results suggest a highly polygenic architecture for variation in consumption and  
244 drug preference, and that the genetic underpinnings for variation in consumption or preference  
245 are both shared and distinct for cocaine and methamphetamine, consistent with the quantitative  
246 genetic analyses.

247

## 248 **A genetic interaction network for consumption behaviors**

249 We next asked whether the genes we identified in the GWA analyses belonged to a known  
250 genetic interaction network. Since the consumption behaviors are highly inter-correlated, we  
251 queried whether all 1,358 candidate genes from the GWA analyses for both cocaine and  
252 methamphetamine combined could be clustered into significant sub-networks based on curated  
253 genetic interactions in *Drosophila*. If we do not allow any missing genes, we find a significant ( $P$   
254 =  $9.99 \times 10^{-4}$ ) network of 81 candidate genes (Fig. 3, Table S7), most of which (88.9%) are  
255 predicted to have human orthologs [55].

256 We performed enrichment analyses [53,54] to gain insight in the biological context for  
257 genes in the network using a false discovery rate  $< 0.05$ . Surprisingly, many canonical signaling  
258 pathways are highly enriched, including the Wingless (Wnt), Cadherin, Cholecystokinin  
259 Receptor (CCKR), Transforming Growth factor beta (TGF), and Fibroblast Growth Factor (FGF)  
260 signaling pathways. Concomitantly, we find high enrichment of molecular function GO terms  
261 associated with regulation of transcription and DNA and protein binding, and biological function  
262 GO terms associated with development (including the development of the nervous system;  
263 Table S7). These results suggest that naturally occurring genetic variation in nervous system  
264 development is associated with variation in propensity to consume psychostimulant drugs.  
265 Furthermore, our results indicate that natural variants in key genes regulating all aspects of fly  
266 development and function can be associated with variation in drug consumption behaviors.

267

## 268 **Functional evaluation of candidate genes**

269 We used RNA interference (RNAi) to functionally test whether reduced expression of candidate  
270 genes implicated by the GWA analyses affect consumption phenotypes. We selected 34  
271 candidate genes for RNAi mediated suppression of gene expression. A total of nine of the  
272 candidate genes were in the network; the others were chosen based on gene expression in the

273 nervous system and their known role in nervous system function, as well as belonging to  
274 enriched pathways and gene ontology categories. We measured consumption of cocaine and  
275 sucrose (Table S8) and methamphetamine and sucrose (Table S9) for three consecutive days,  
276 separately for males and females, for each of the RNAi and control genotypes, exactly as  
277 described for the DGRP lines.

278 We performed three-way fixed effect ANOVAs for each *UAS*-RNAi and control genotype,  
279 separately for males and females (Tables S10, S11). The main effects in these models are  
280 genotype (*L*, RNAi and control), solution (*S*, sucrose and drug) and exposure (*E*, first and third).  
281 A significant *L* effect denotes a difference in overall consumption between the RNAi and control  
282 genotypes; a significant *S* effect indicates a difference in preference between sucrose alone and  
283 sucrose with drug; and a significant *E* effect indicates a difference in consumption between  
284 exposures 1 and 3. Significant *L*×*S* and *L*×*E* interaction terms denote, respectively, a difference  
285 in preference between the RNAi and control genotypes, and a difference in consumption  
286 between exposures 1 and 3 between the two genotypes. A significant *L*×*S*×*E* interaction  
287 indicates a change in preference with repeated exposure between the RNAi and control  
288 genotypes. We are most interested in the main effect of genotype and interactions with  
289 genotype; *i.e.*, consumption, preference, change of consumption and change of preference.

290 First, we used a weak ubiquitous *GAL4* driver crossed to all 34 *UAS*-RNAi genotypes  
291 and their respective controls. All candidate genes had a significant ( $P < 0.05$ ) effect on at least  
292 one of the consumption traits in at least one drug or sex combination. A total of 22 (25) genes  
293 affected consumption of cocaine (methamphetamine), 21 (23) affected a change of  
294 consumption with exposure to cocaine (methamphetamine), 16 (10) affected cocaine  
295 (methamphetamine) preference, and 11 (11) affected a change in cocaine (methamphetamine)  
296 preference with exposure in males and/or females (Tables S10, S11, Fig.s S1-S3). There were  
297 pronounced sex- and drug-specific effects for all drug-related traits. The majority of RNAi  
298 genotypes showed reduced consumption of cocaine and/or methamphetamine compared to

299 their controls, dependent on exposure and sex. If consumption is positively associated with  
300 gene expression, this suggests that the products of these genes contribute to drug  
301 consumption. On the other hand, several RNAi constructs caused increased drug consumption,  
302 suggesting that naturally occurring variants that decrease expression of these genes could  
303 predispose to drug preference. Finally, several RNAi-targeted genes exhibit a relative increase  
304 or decrease in drug consumption compared to the control at the third exposure, indicating  
305 experience-dependent change in preference.

306 To extend and refine our RNAi analysis, we next selected 10 genes (*Dop1R1*, *Ect4*, *ed*,  
307 *mld*, *msi*, *Oct-TyrR*, *olf413*, *Snoo*, *Vha100-1*, *wmd*) from among those that showed phenotypic  
308 effects when targeted by RNAi under the ubiquitous driver and which have known effects on the  
309 nervous system. We assessed functional effects of these genes on consumption traits when  
310 their corresponding RNAi constructs were expressed under the control of the neuronal-specific  
311 *elav* driver or glial-specific *repo* driver. All of these genes had a significant ( $P < 0.05$ ) effect on at  
312 least one of the consumption traits in at least one drug or sex combination under the *elav* driver,  
313 and all but *Snoo* had significant effects on at least one of the consumption traits in at least one  
314 drug or sex combination under the *repo* driver. With neuronal-specific suppression of gene  
315 expression, 9 (10) genes affected consumption of cocaine (methamphetamine), 6 (7) affected a  
316 change in consumption with exposure to cocaine (methamphetamine), 2 (7) affected cocaine  
317 (methamphetamine) preference, and 3 (6) affected a change in cocaine (methamphetamine)  
318 preference with exposure in males and/or females (Tables S10, S11, Fig.s 4, S4). With glia-  
319 specific suppression of gene expression, 4 (7) genes affected consumption of cocaine  
320 (methamphetamine), 7 (6) affected a change in consumption with exposure to cocaine  
321 (methamphetamine), 3 (0) affected cocaine (methamphetamine) preference, and 2 (3) affected  
322 a change in cocaine (methamphetamine) preference with exposure in males and/or females  
323 (Tables S10, S11, Fig.s 4, 5, S4). These effects were largely sex-, drug- and driver-specific. We

324 infer from these results that variation in gene expression in both neurons and glia contributes to  
325 phenotypic variation in drug intake behaviors.

326 In humans, the mesolimbic dopaminergic projection plays a role in drug addiction. In  
327 *Drosophila*, the mushroom bodies could play an analogous role, as they are integrative centers  
328 in the fly brain associated with experience-dependent learning [56,57], dependent on  
329 dopaminergic input. To test whether the mushroom bodies and dopaminergic projection neurons  
330 could serve as neural substrates that contribute to variation in drug consumption or preference,  
331 we focused on four genes (*Dop1R1*, *ed*, *msi*, *Snoo*,) that showed robust phenotypic effects  
332 when targeted with a corresponding *elav*-driven RNAi. Knockdown of all four genes with a  
333 mushroom body specific driver resulted in significant effects on consumption of cocaine and/or  
334 methamphetamine for at least one drug and sex combination (Tables S10, S11, Fig.s 4, 5, S5).  
335 Expression of RNAi in mushroom bodies affected change in consumption of cocaine and  
336 methamphetamine for *Dop1R1*; cocaine preference and change of methamphetamine  
337 preference for *ed*; change in consumption of cocaine for *msi*; and cocaine and  
338 methamphetamine preference, cocaine preference, change of cocaine preference and change  
339 of consumption of methamphetamine for *Snoo*. Expression of RNAi in dopaminergic neurons  
340 affected change of consumption of cocaine and change in methamphetamine preference for  
341 *Dop1R1*; consumption for cocaine and methamphetamine, change of consumption of  
342 methamphetamine and cocaine preference for *ed*; consumption of cocaine and  
343 methamphetamine, change of consumption of cocaine, and cocaine preference for *msi*; and all  
344 four traits for *Snoo* (Tables S10, S11, Fig.s 4, 5, S5). These effects are largely sex-, drug- and  
345 driver-specific.

346 These results suggest that, despite differences in the genetic underpinnings of  
347 susceptibility to cocaine and methamphetamine, phenotypic manifestation of genetic variation in  
348 consumption and development of preference for both drugs is channeled through a neural  
349 network that comprises dopaminergic projections to the mushroom bodies.

350

351 **DISCUSSION**

352 Although studies using mice [58,59], rats [60,61], primates [62] and humans [63] provide  
353 important information about the cellular, developmental, physiological, and behavioral effects of  
354 psychostimulants, these systems are less suited to dissecting the relationship between naturally  
355 occurring genetic variation and phenotypic variation in individual susceptibility to drug  
356 consumption and/or preference. Here, we show that *D. melanogaster* harbors substantial  
357 naturally occurring variation for all consumption-related behaviors, including experience-  
358 dependent change in consumption, innate drug preference and experience-dependent change  
359 in preference, under conditions where we can obtain replicated measurements of consumption  
360 for each genotype in a choice assay performed over three successive days under controlled  
361 environmental conditions. We show that genetic variation for consumption and preference  
362 metrics is both shared between males and females and the different exposures, but is also sex-,  
363 exposure- and drug-specific. Sex differences in drug self-administration and addiction have also  
364 been shown in humans and mammalian animal models [64-72].

365 The Diagnostic and Statistical Manual of Mental Disorders, Fifth Edition (DSM-V) defines  
366 11 criteria for substance use disorder in humans, all related to continuing to use of the  
367 substance despite adverse social and physiological effects and the development of tolerance  
368 with repeated exposure. The DSM-V also recognizes that there is individual variability of  
369 unknown etiology for the propensity both to experiment with psychostimulants and to develop  
370 symptoms of substance abuse following initial exposure. Previous studies of effects of cocaine  
371 [35,37-39,73-76] and methamphetamine [77] in *Drosophila* examined mutations and  
372 pharmacological interventions using locomotor-based assays, clearly demonstrating an adverse  
373 effect of these substances. However, previous *Drosophila* studies have not assessed naturally  
374 occurring variation in drug self-administration and change in this behavior on repeated



375 exposure, which may better model the genetic basis of individual susceptibility – or resistance –  
376 to substance abuse and the development of tolerance (increased drug preference over time).

377 To begin to understand the nature of the genetic basis for variation in drug consumption  
378 and preference, we performed GWA analyses for all consumption traits, separately for cocaine  
379 and methamphetamine, using 1,891,456 DNA sequence variants present in the 46 DGRP lines  
380 with minor allele frequencies greater than 0.05 [43]. We identified 1,358 unique candidate genes  
381 using a lenient significance threshold of  $5 \times 10^{-5}$ . We hypothesized that these candidate genes  
382 would be enriched for true positive associations despite the low power of the GWA analyses  
383 and that choosing genes for functional evaluation from this list would be more productive than  
384 choosing genes at random. Observations supporting this hypothesis are that mutations in  
385 several candidate genes have previously been shown to affect cocaine or ethanol-related  
386 phenotypes in *Drosophila* [52], that the candidate genes are highly enriched for GO terms  
387 involved in the development and function of the nervous system, and that 81 candidate genes  
388 can be assembled into a known genetic interaction network (Fig. 3), which is highly unlikely ( $P =$   
389  $9.9 \times 10^{-3}$ ) to occur by chance. The candidate genes in the significant genetic interaction  
390 network are enriched for several canonical signaling pathways as well as all aspects of  
391 development, including nervous system development. These observations suggest that subtle  
392 genetic variation in nervous system development is associated with variation in propensity for  
393 consumption of psychostimulant drugs. Nearly 90% of the genes in the network have human  
394 orthologs and are candidates for future translational studies.

395 We selected nine candidate genes in the significant genetic network and 25 additional  
396 candidate genes to assess whether RNAi reduction using a weak ubiquitous *GAL4* driver  
397 affected consumption traits, using the same experimental design as for the DGRP lines. All of  
398 these genes affected at least one consumption trait/sex/drug. However, there is considerable  
399 variation in the effects of different drivers on consumption, preference and change in preference  
400 for cocaine and methamphetamine, which likely reflects variation in the effects of RNA



401 interference on different neural elements of a complex integrated neural circuitry. Indeed,  
402 several candidate genes, functionally implicated by RNAi, are associated with neural  
403 development and represent several early developmental signaling pathways. *Snoo* has been  
404 identified as a negative regulator of the decapentaplegic signaling pathway [78,79] and has  
405 been implicated in dendritic patterning [80]. Echinoid, the gene product of *ed*, is an  
406 immunoglobulin domain containing membrane protein of adherens junctions that interacts with  
407 multiple developmental signaling pathways, including Egrf, Notch and Hippo signaling [81-83].  
408 Musashi, encoded by *msi*, is a neural RNA binding protein that interacts with Notch signaling to  
409 determine cell fate [84]. RNAi targeting of expression of these genes under *MB-GAL4* or *TH-*  
410 *GAL4* drivers show different effects on consumption, change in consumption, preference and  
411 change in preference for the two drugs (Fig. S5).

412         Among the functionally validated candidate genes, *Oct-TyrR* and *Dop1R1* are of special  
413 interest. *Oct-TyrR* encodes an octopamine-tyramine receptor expressed in mushroom bodies  
414 [85], and *Dop1R1*, which encodes a dopamine receptor enriched in the mushroom bodies, has  
415 previously been implicated in aversive and appetitive conditioning [86], innate courtship  
416 behavior [87] and sleep-wake arousal [88]. Loss-of-function mutations of *Dop1R1* increase  
417 sleep and these effects are reversed by administration of cocaine [88]. Octopamine and  
418 tyramine act on astrocytes via the Oct-Tyr1 receptor and this activation of astrocytes can in turn  
419 modulate dopaminergic neurons [89]. Thus, we can hypothesize that combinations of  
420 octopaminergic and dopaminergic signaling in the mushroom bodies can modulate drug  
421 consumption and/or experience-dependent changes in consumption or preference following  
422 repeated exposure to cocaine or methamphetamine.

423         Finally, genes which were functionally validated with RNAi represent evolutionarily  
424 conserved processes. Future studies can assess whether their human counterparts play a role  
425 in variation in susceptibility to psychostimulant drug use in human populations.

426

## 427 **MATERIALS AND METHODS**

### 428 **Drosophila stocks**

429 The DGRP, *UAS-RNAi* and *GAL4* driver lines used are listed in Table S12. The DGRP lines are  
430 maintained in the Mackay laboratory. RNAi lines [47] were obtained from the Vienna Drosophila  
431 Resource Center and the *GAL4* driver lines from the Bloomington, Indiana Drosophila stock  
432 center. All lines were maintained on standard cornmeal/yeast/molasses medium at 25°C on a  
433 12 hour light/dark cycle with constant humidity of 50%.

434

### 435 **Consumption assay**

436 We used a two-capillary Capillary Feeder (CAFE) assay [44-46] to measure drug consumption.  
437 Briefly, five 3-5 day old flies per genotype/sex were anesthetized using CO<sub>2</sub> and placed on  
438 cornmeal/yeast/molasses/agar medium one day prior to the assay. Flies were transferred  
439 without anesthesia 45 minutes prior to the assay to vials containing 4-5ml of 1.5% agar (Sigma  
440 Aldrich). Two capillaries (VWR International: 12.7 cm long, 5 µl total volume) containing 4%  
441 sucrose (Sigma Aldrich) + 1% yeast (Fisher Scientific) or 4% sucrose + 1% yeast + drug, with a  
442 mineral oil (Sigma Aldrich) overlay (to minimize evaporation), were inserted in the top of each  
443 vial. Cocaine and methamphetamine were obtained from the National Institute on Drug Abuse  
444 under Drug Enforcement Administration license RA0443159. Flies were allowed to feed for 16-  
445 18 hours with the vials placed in an enclosed plastic chamber wrapped in a plastic bag under a  
446 12 hour light/dark cycle with constant humidity of 50%. For each experiment, an identical set of  
447 vials without flies was included in each chamber to determine evaporation loss. The capillaries  
448 were then removed and the volume of food consumed (1 mm = 0.067 µl) in each calculated as  
449 described previously [90]. The capillaries were replaced with a Drosophila activity monitor tube  
450 (TriKinetics, Inc. Waltham, MA) containing standard cornmeal/yeast/molasses medium for a  
451 recovery period of 4-6 hours. The assay was performed on three consecutive days for each vial  
452 of flies. A total of 10 replicate vials were tested for each genotype and sex.

453 We defined four behaviors: total amount of each solution consumed, drug preference,  
454 and change in consumption and change of preference between exposures 3 and 1. Preference  
455 was quantified in two ways: as the difference between the amount of drug and sucrose  
456 consumed (Preference A), and as this difference scaled by the total amount consumed  
457 (Preference B).

458

### 459 **Genetic variation in drug consumption behaviors in the DGRP**

460 We performed four-way factorial mixed model analyses of variance (ANOVA) to partition  
461 variation in consumption in the DGRP:  $Y = \mu + L + E + S + X + (L \times E) + (L \times S) + (L \times X) + (E \times$   
462  $S) + (E \times X) + (S \times X) + (L \times E \times S) + (L \times E \times X) + (L \times S \times X) + (E \times S \times X) + (L \times E \times S \times X) +$   
463  $\epsilon$ , where  $Y$  is consumption;  $\mu$  is the overall mean;  $L$  is the random effect of line;  $E$ ,  $S$ , and  $X$  are  
464 the fixed effects of exposure (day 1-3), solution (drug, sucrose), and sex (males, females); and  $\epsilon$   
465 is the residual variation between replicate vials. The main effect of  $L$  and all interaction terms  
466 with  $L$  are genetic factors affecting drug consumption. We also ran the same ANOVA models to  
467 compare the effects of cocaine and methamphetamine on consumption, separately for males  
468 and females. The full model for variation in change in consumption over time is  $Y = \mu + L + S +$   
469  $X + (L \times S) + (L \times X) + (S \times X) + (L \times S \times X) + \epsilon$ . We assessed variation in the development of  
470 preference using the model  $Y = \mu + L + E + X + (L \times E) + (L \times X) + (E \times X) + (L \times E \times X) + \epsilon$ . We  
471 also assessed whether there is natural variation in the change of preference over time using the  
472 model  $Y = \mu + L + X + (L \times X) + \epsilon$ . We also ran reduced models for each trait. All ANOVAs were  
473 performed using the PROC GLM function in SAS. We used the R function pf to assign exact  $P$ -  
474 values.

475

### 476 **Quantitative genetic analyses in the DGRP**

477 We used the SAS PROC MIXED function to estimate variance components for each of the  
478 random effect terms in the full and reduced models. The R package lmer and lmerTest were

479 utilized in combination with the pchisq function to assign  $P$ -values for the segregating genetic  
480 variation for each trait. We computed broad sense heritabilities as the sum of all genetic  
481 variance components divided by the total phenotypic variance for each model, and broad sense  
482 heritabilities of line means as the sum of all genetic variance components divided by the sum of  
483 all genetic variance components plus the environmental variance/10, where 10 is the number of  
484 replicate vials per line, sex, exposure and treatment. We computed pairwise genetic correlations  
485 as  $r_G = \sigma_L^2 / \sigma_{L1}\sigma_{L2}$ , where  $\sigma_L^2$  is the among line variance from the appropriate two-way factorial  
486 ANOVA and  $\sigma_{L1}$  and  $\sigma_{L2}$  are the among line standard deviations from the one-way ANOVA for  
487 each condition. We computed Pearson product-moment correlations of line means to estimate  
488 phenotypic correlations between different traits.

489

#### 490 **Genome wide association mapping in the DGRP**

491 We performed GWA analyses on line means for all consumption traits using the DGRP pipeline  
492 (<http://dgrp2.gnets.ncsu.edu/>). This pipeline accounts for effects of Wolbachia infection status,  
493 major polymorphic inversions and polygenic relatedness [43] and implements single-variant  
494 tests of association for additive effects of variants with minor allele frequencies  $\geq 0.05$ . We  
495 tested effects of 1,891,456 DNA sequence variants on each trait.

496

#### 497 **Network analysis**

498 We annotated candidate genes identified by the GWA analyses using Flybase release 5.57 [56]  
499 and mapped gene-gene networks through the genetic interaction database downloaded from  
500 Flybase. We then constructed a subnetwork using Cytoscape 3.5.1 where candidate genes  
501 directly interact with each other. We evaluated the significance ( $\alpha = 0.05$ ) of the constructed  
502 subnetwork by a randomization test [91-93].

503

504

## 505 **Gene Ontology analysis**

506 We carried out gene ontology (GO) enrichment analysis with PANTHER 11.1

507 (<http://pantherdb.org/>) [53,54].

508

## 509 **RNAi knockdown of gene expression**

510 We used the binary *GAL4-UAS* system for RNAi-targeted knockdown of expression of

511 candidate genes associated with variation in consumption of cocaine or methamphetamine with

512 a weak ubiquitous driver (*Ubi156-GAL4*) and drivers specific for neurons (*elav-GAL4*), glia

513 (*repo-GAL4*), mushroom bodies (*201Y-GAL4*) and dopaminergic neurons (*TH-GAL4*). We

514 crossed 3 homozygous *GAL4* driver males to 5-7 homozygous females harboring a unique

515 *UAS-RNAi* transgene or the progenitor control to generate F1 *GAL4-UAS-RNAi* and *GAL4*

516 control progeny. We assessed the consumption traits exactly as described above for the DGRP

517 lines. Differences between RNAi lines and their corresponding control lines for consumption

518 were assessed with a fixed-effect ANOVA, separately for males and females. The full model

519 was:  $Y = \mu + L + E + S + (L \times E) + (E \times S) + (L \times S) + (L \times E \times S) + \varepsilon$ , where  $Y$  denotes the

520 mean consumption,  $E$  denotes the different exposures,  $L$  is the line (Control or RNAi),  $S$

521 denotes the different solutions (sucrose or cocaine/methamphetamine), and  $\varepsilon$  the error

522 variance. Differences between RNAi lines and controls for change in consumption and

523 preference were also assessed with fixed-effect ANOVAs. The full model for change in

524 consumption was:  $Y = \mu + L + S + (L \times S) + \varepsilon$ , while the full model for preference was  $Y = \mu + L$

525  $+ E + (L \times E) + \varepsilon$ . All ANOVAs were run using R.

526

## 527 **ACKNOWLEDGMENTS**

528 We thank Mathew J. Eddinger, Emily L. Davis, Kishan N. Patel, and Shaunaci Stevens for  
529 technical assistance. This work was supported by grants U01 DA041613 and R01 AA016560  
530 from the National Institutes of Health to TFCM and RRHA.

531

## 532 REFERENCES

- 533 1. Galbraith N. The methamphetamine problem. *BJPsych Bull.* 2015;39: 218-220.  
534 doi:10.1192/pb.bp.115.050930
- 535 2. World Drug Report 2018 (United Nations publication, Sales No. E.18.XI.9)
- 536 3. National Institute on Drug Abuse. Trends & Statistics. 2017;  
537 <https://www.drugabuse.gov/related-topics/trends-statistics>
- 538 4. Horne MK, Lee J, Chen F, Lanning K, Tomas D, Lawrence AJ. Long-term administration  
539 of cocaine or serotonin reuptake inhibitors results in anatomical and neurochemical  
540 changes in noradrenergic, dopaminergic, and serotonin pathways. *J Neurochem.*  
541 2008;106: 1731-1744. doi:10.1111/j.1471-4159.2008.05534.x
- 542 5. Verma V. Classic studies on the interaction of cocaine and the dopamine transporter. *Clin*  
543 *Psychopharmacol Neurosci.* 2015;13: 227-238. doi:10.9758/cpn.2015.13.3.227
- 544 6. Seiden LS, Sabol KE, Ricaurte GA. Amphetamine: Effects on catecholamine systems and  
545 behavior. *Annu Rev Pharmacol Toxicol.* 1993;33: 639-676.  
546 doi:10.1146/annurev.pa.33.040193.003231
- 547 7. Sulzer D, Sonders MS, Poulsen NW, Galli A. Mechanisms of neurotransmitter release by  
548 amphetamines: a review. *Prog Neurobiol.* 2005;75: 406-433.  
549 doi:10.1016/j.pneurobio.2005.04.003
- 550 8. Mariani JJ, Levin FR. Treatment strategies for co-occurring ADHD and substance use  
551 disorders. *Am J Addict.* 16: 45-56. doi:10.1080/10550490601082783
- 552 9. Bonci A, Bernardi G, Grillner P, Mercuri NB. The dopamine-containing neuron: maestro or  
553 simple musician in the orchestra of addiction? *Trends Pharmacol Sci.* 2003; 24: 172-177.

- 554 doi: 10.1016/S0165-6147(03)00068-3
- 555 10. Roncero C, Daigre C, Grau-López L, Barral C, Pérez-Pazos J, Martínez-Luna N, Casas  
556 M. An international perspective and review of cocaine-induced psychosis: a call to action.  
557 *Subst Abus.* 2014; 35: 321-327. doi: 10.1080/08897077.2014.933726.
- 558 11. Hellem TL. A review of methamphetamine dependence and withdrawal treatment: A  
559 focus on anxiety outcomes. *J Subst Abuse Treat.* 2016;71: 16-22.  
560 doi:10.1016/j.jsat.2016.08.011.
- 561 12. Hall FS, Drgonova J, Jain S, Uhl GR. Implications of genome wide association studies for  
562 addiction: Are our a priori assumptions all wrong? *Pharmacol Ther.* 2013;140: 267-279.  
563 doi:10.1016/j.pharmthera.2013.07.006
- 564 13. Tsuang MT, Bar JL, Harley RM, Lyons MJ. The Harvard twin study of substance abuse:  
565 what we have learned. *Harv Rev Psychiatry.* 2001;9: 267-279.
- 566 14. Agrawal A, Lynskey MT. Are there genetic influences on addiction: evidence from family,  
567 adoption and twin studies. *Addiction.* 2008;103: 1069-1081. doi:10.1111/j.1360-  
568 0443.2008.02213.x
- 569 15. Noble EP, Blum K, Khalsa ME, Ritchie T, Montgomery A, Wood RC, et al. Allelic  
570 association of the D2 dopamine receptor gene with cocaine dependence. *Drug Alcohol*  
571 *Depend.* 1993;33: 271-285.
- 572 16. Comings DE, Muhleman D, Ahn C, Gysin R, Flanagan SD. The dopamine D2 receptor  
573 gene: a genetic risk factor in substance abuse. *Drug Alcohol Depend.* 1994; 34: 175-180.
- 574 17. Persico AM, Bird G, Gabbay FH, Uhl GR. D2 dopamine receptor gene TaqI A1 and B1  
575 restriction fragment length polymorphisms: enhanced frequencies in psychostimulant-  
576 preferring polysubstance abusers". *Biol Psychiatry.* 1996;40: 776-784.
- 577 18. Moyer RA, Wang D, Papp AC, Smith RM, Duque L, Mash DC, et al. Intronic  
578 polymorphisms affecting alternative splicing of human dopamine D2 receptor are  
579 associated with cocaine abuse. *Neuropsychopharmacol.* 2011;36: 753-762.

- 580 19. Gelernter J, Southwick S, Goodson S, Morgan A, Nagy L, Charney DS. No association  
581 between D2 dopamine receptor (*DRD2*) “A” system alleles, or *DRD2* haplotypes, and  
582 posttraumatic stress disorder. *Biol Psychiatry*. 1999;45: 620-625.
- 583 20. Serý O, Vojtová V, Zvolský P. The association study of *DRD2*, *ACE* and *AGT* gene  
584 polymorphisms and methamphetamine dependence. *Physiol Res*. 2001;50: 43-50.
- 585 21. Hong C-J, Cheng C-Y, Shu L-RR, Yang C-Y, Tsai S-J. Association study of the dopamine  
586 and serotonin transporter genetic polymorphisms and methamphetamine abuse in  
587 Chinese males. *J Neural Transm*. 2003;110: 345-351. doi:10.1007/s00702-002-0790-8
- 588 22. Messas G, Meira-Lima I, Turchi M, Franco O, Guindalini C, Castelo A, et al. Association  
589 study of dopamine D2 and D3 receptor gene polymorphisms with cocaine dependence.  
590 *Psychiatr Genet*. 2005;15: 171-174.
- 591 23. Fernández-Castillo N, Ribasés M, Roncero C, Casas M, Gonzalvo B, Cormand B.  
592 Association study between the *DAT1*, *DBH* and *DRD2* genes and cocaine dependence in  
593 a Spanish sample. *Psychiatr Genet*. 2010;20: 317-320.  
594 doi:10.1097/YPG.0b013e32833b6320
- 595 24. Lohoff FW, Bloch PJ, Hodge R, Nall AH, Ferraro TN, Kampman KM, et al. Association  
596 analysis between polymorphisms in the dopamine D2 receptor (*DRD2*) and dopamine  
597 transporter (*DAT1*) genes with cocaine dependence. *Neurosci Lett*. 2010;473: 87-91.  
598 doi:10.1016/j.neulet.2010.02.021
- 599 25. Gelernter J, Kranzler HR, Satel SL, Rao PA. Genetic association between dopamine  
600 transporter protein alleles and cocaine-induced paranoia. *Neuropsychopharmacol*.  
601 1994;11: 195-200.
- 602 26. Liu HC, Lin SK, Liu SK, Chen SL, Hu CJ, Chang JG, et al. *DAT* polymorphism and  
603 diverse clinical manifestations in methamphetamine abusers. *Psychiatr Genet*. 2004;  
604 14:33-37.
- 605 27. Guindalini C, Howard M, Haddley K, Laranjeira R, Collier D, Ammar N, et al. A dopamine



- 606 transporter gene functional variant associated with cocaine abuse in a Brazilian sample.  
607 Proc Natl Acad Sci USA. 2006;103: 4552-4557. doi:10.1073/pnas.0504789103
- 608 28. Martinez D, Gelernter J, Abi-Dargham A, van Dyck CH, Kegeles L, Innis RB, et al. The  
609 variable number of tandem repeats polymorphism of the dopamine transporter gene is  
610 not associated with significant change in dopamine transporter phenotype in humans.  
611 Neuropsychopharmacol. 2001;24: 553-560.
- 612 29. Patkar AA, Berrettini WH, Hoehe M, Hill KP, Sterling RC, Gottheil E, et al. Serotonin  
613 transporter (5-HTT) gene polymorphisms and susceptibility to cocaine dependence  
614 among African-American individuals. Addict Biol. 2001;6: 337-345.  
615 doi:10.1080/13556210020077064
- 616 30. Pandey UB, Nichols CD. Human disease models in *Drosophila melanogaster* and the role  
617 of the fly in therapeutic drug discovery. Pharmacol Rev. 2011;63: 411-436.  
618 doi:10.1124/pr.110.003293
- 619 31. Wang KH, Penmatsa A, Gouaux E. Neurotransmitter and psychostimulant recognition by  
620 the dopamine transporter. Nature. 2015;521: 322-327. doi:10.1038/nature14431
- 621 32. Andretic R, van Swinderen B, Greenspan RJ. Dopaminergic modulation of arousal in  
622 *Drosophila*. Curr Biol. 2005;15: 1165-1175. doi:10.1016/j.cub.2005.05.025
- 623 33. Andretic R, Kim Y-C, Jones FS, Han K-A, Greenspan RJ. *Drosophila* D1 dopamine  
624 receptor mediates caffeine-induced arousal. Proc Natl Acad Sci USA. 2008;105: 20392-  
625 20397. doi:10.1073/pnas.0806776105
- 626 34. Walters KR, Rupassara SI, Markelz RJC, Leakey ADB, Muir WM, Pittendrigh BR.  
627 Methamphetamine causes anorexia in *Drosophila melanogaster*, exhausting metabolic  
628 reserves and contributing to mortality. J Toxicol Sci. 2012;37: 773-790.
- 629 35. McClung C, Hirsh J. Stereotypic behavioral responses to free-base cocaine and the  
630 development of behavioral sensitization in *Drosophila*. Curr Biol. 1998;8: 109-112.
- 631 36. Torres G, Horowitz JM. Activating properties of cocaine and cocaethylene in a behavioral

- 632 preparation of *Drosophila melanogaster*. Synapse. 1998;29: 148-161.  
633 doi:10.1002/(SICI)1098-2396(199806)29:2<148::AID-SYN6>3.0.CO;2-7
- 634 37. Bainton RJ, Tsai LT, Singh CM, Moore MS, Neckameyer WS, Heberlein U. Dopamine  
635 modulates acute responses to cocaine, nicotine and ethanol in *Drosophila*. Curr Biol.  
636 2000;10: 187-194.
- 637 38. Rothenfluh A, Heberlein U. Drugs, flies, and videotape: the effects of ethanol and cocaine  
638 on *Drosophila* locomotion. Curr Opin Neurobiol. 2002;12: 639-645.
- 639 39. Wolf FW, Heberlein U. Invertebrate models of drug abuse. Journal of Neurobiology. 54:  
640 161-178. doi:10.1002/neu.10166
- 641 40. Dimitrijevic N, Dzitoyeva S, Manev H. An automated assay of the behavioral effects of  
642 cocaine injections in adult *Drosophila*. J Neurosci Methods. 2004;137: 181-184.  
643 doi:10.1016/j.jneumeth.2004.02.023
- 644 41. George R, Lease K, Burnette J, Hirsh J. A “bottom-counting” video system for measuring  
645 cocaine-induced behaviors in *Drosophila*. In: Young MW, editor. Methods in Enzymology.  
646 Academic Press; 2005. pp. 841-851.  
647 <http://www.sciencedirect.com/science/article/pii/S0076687905930449>
- 648 42. Mackay TFC, Richards S, Stone EA, Barbadilla A, Ayroles JF, Zhu D, et al. The  
649 *Drosophila melanogaster* Genetic Reference Panel. Nature. 2012;482: 173-178.  
650 doi:10.1038/nature10811
- 651 43. Huang W, Massouras A, Inoue Y, Peiffer J, Ràmia M, Tarone AM, et al. Natural variation  
652 in genome architecture among 205 *Drosophila melanogaster* Genetic Reference Panel  
653 lines. Genome Res. 2014;24: 1193-1208. doi:10.1101/gr.171546.113
- 654 44. Ja WW, Carvalho GB, Mak EM, Rosa NN de la, Fang AY, Liang JC, et al. Prandiology of  
655 *Drosophila* and the CAFE assay. Proc Natl Acad Sci USA. 2007;104: 8253-8256.  
656 doi:10.1073/pnas.0702726104
- 657 45. Devineni AV, Heberlein U. Preferential ethanol consumption in *Drosophila* models

- 658 features of addiction. *Curr Biol.* 2009;19(24):2126-2132. doi: 10.1016/j.cub.2009.10.070.
- 659 46. Devineni AV, Heberlein U. Addiction-like behavior in *Drosophila*. *Commun Integr Biol.*  
660 2010;3(4):357-359.
- 661 47. Dietzl G, Chen D, Schnorrer F, Su K-C, Barinova Y, Fellner M, et al. A genome-wide  
662 transgenic RNAi library for conditional gene inactivation in *Drosophila*. *Nature.* 2007;448:  
663 151-156. doi:10.1038/nature05954
- 664 48. Holgate JY, Garcia H, Chatterjee S, Bartlett SE. Social and environmental enrichment  
665 has different effects on ethanol and sucrose consumption in mice. *Brain Behav.* 2017;7.  
666 doi:10.1002/brb3.767
- 667 49. Martinelli DC, Chew KS, Rohlmann A, Lum MY, Ressler S, Hattar S, et al. Expression of  
668 *C1q/3* in discrete neuronal populations controls efferent synapse numbers and diverse  
669 behaviors. *Neuron.* 2016;91: 1034-1051. doi:10.1016/j.neuron.2016.07.002
- 670 50. Liu QR, Drgon T, Johnson C, Walther D, Hess J, Uhl GR. Addiction molecular genetics:  
671 639,401 SNP whole genome association identifies many “cell adhesion” genes. *Am J*  
672 *Med Genet B Neuropsychiatr Genet.* 2006;141B: 918-925. doi:10.1002/ajmg.b.30436
- 673 51. Tarlungeanu DC, Deliu E, Dotter CP, Kara M, Janiesch PC, Scalise M, et al. Impaired  
674 amino acid transport at the blood brain barrier is a cause of autism spectrum disorder.  
675 *Cell.* 2016;167: 1481-1494.e18. doi:10.1016/j.cell.2016.11.013
- 676 52. Kaun KR, Devineni AV, Heberlein U. *Drosophila melanogaster* as a model to study drug  
677 addiction. *Hum Genet.* 2012;131: 959-975. doi: 10.1007/s00439-012-1146-6
- 678 53. Thomas PD, Campbell MJ, Kejariwal A, Mi H, Karlak B, Daverman R, et al. PANTHER: a  
679 library of protein families and subfamilies indexed by function. *Genome Res.* 2003;13:  
680 2129-2141. doi:10.1101/gr.772403
- 681 54. Mi H, Muruganujan A, Casagrande JT, Thomas PD. Large-scale gene function analysis  
682 with the PANTHER classification system. *Nat Protoc.* 2013;8: 1551-1566.  
683 doi:10.1038/nprot.2013.092

- 684 55. McQuilton P, St Pierre SE, Thurmond J. FlyBase 101 – the basics of navigating FlyBase.  
685 Nucleic Acids Res. 2012;40: D706-D714. doi:10.1093/nar/gkr1030
- 686 56. Davis RL. Traces of *Drosophila* memory. Neuron. 2011;70: 8-19.  
687 doi:10.1016/j.neuron.2011.03.012
- 688 57. Widmer YF, Bilican A, Bruggmann R, Sprecher SG. Regulators of long-term memory  
689 revealed by mushroom body-specific gene expression profiling in *Drosophila*  
690 *melanogaster*. Genetics. 2018;209:1167-1181. doi: 10.1534/genetics.118.301106
- 691 58. Salahpour A, Ramsey AJ, Medvedev IO, Kile B, Sotnikova TD, Holmstrand E, et al.  
692 Increased amphetamine-induced hyperactivity and reward in mice overexpressing the  
693 dopamine transporter. Proc Natl Acad Sci USA. 2008;105: 4405-4410.  
694 doi:10.1073/pnas.0707646105
- 695 59. Hoops D, Reynolds LM, Restrepo-Lozano J-M, Flores C. Dopamine development in the  
696 mouse orbital prefrontal cortex is protracted and sensitive to amphetamine in  
697 adolescence. eNeuro. 2018;5. doi:10.1523/ENEURO.0372-17.2017
- 698 60. Walker QD, Kuhn CM. Cocaine increases stimulated dopamine release more in  
699 periadolescent than adult rats. Neurotoxicol Teratol. 2008;30: 412-418.  
700 doi:10.1016/j.ntt.2008.04.002
- 701 61. Koulchitsky S, De Backer B, Quertemont E, Charlier C, Seutin V. Differential effects of  
702 cocaine on dopamine neuron firing in awake and anesthetized rats.  
703 Neuropsychopharmacol. 2012;37: 1559-1571. doi:10.1038/npp.2011.339
- 704 62. Jedema HP, Narendran R, Bradberry CW. Amphetamine-induced release of dopamine in  
705 primate prefrontal cortex and striatum: striking differences in magnitude and time course.  
706 J Neurochem. 2014;130: 490-497. doi:10.1111/jnc.12743
- 707 63. Ashok AH, Mizuno Y, Volkow ND, Howes OD. Association of stimulant use with  
708 dopaminergic alterations in users of cocaine, amphetamine, or methamphetamine: A  
709 systematic review and meta-analysis. JAMA Psychiatry. 2017;74: 511-519.

- 710 doi:10.1001/jamapsychiatry.2017.0135
- 711 64. Becker JB, Hu M. Sex differences in drug abuse. *Front Neuroendocrinol.* 2008;29: 36-47.
- 712 doi:10.1016/j.yfrne.2007.07.003
- 713 65. Fattore L, Altea S, Fratta W. Sex differences in drug addiction: a review of animal and
- 714 human studies. *Womens Health (Lond).* 2008;4:51-65. doi: 10.2217/17455057.4.1.51.
- 715 66. Fattore L, Fadda P, Fratta W. Sex differences in the self-administration of cannabinoids
- 716 and other drugs of abuse. *Psychoneuroendocrinology.* 2009;34 Suppl 1:S227-S236. doi:
- 717 10.1016/j.psyneuen.2009.08.008.
- 718 67. Cox BM, Young AB, See RE, Reichel CM. Sex differences in methamphetamine seeking
- 719 in rats: Impact of oxytocin. *Psychoneuroendocrinol.* 2013;38: 2343-2353.
- 720 doi:10.1016/j.psyneuen.2013.05.005
- 721 68. Fox HC, Morgan PT, Sinha R. Sex differences in guanfacine effects on drug craving and
- 722 stress arousal in cocaine-dependent individuals. *Neuropsychopharmacol.* 2014;39: 1527-
- 723 1537. doi:10.1038/npp.2014.1
- 724 69. Kennedy AP, Epstein DH, Phillips KA, Preston KL. Sex differences in cocaine/heroin
- 725 users: drug-use triggers and craving in daily life. *Drug Alcohol Depend.* 2013;132: 29-37.
- 726 doi:10.1016/j.drugalcdep.2012.12.025
- 727 70. Becker JB, McClellan ML, Reed BG. Sex differences, gender and addiction. *J Neurosci*
- 728 *Res.* 2017;95: 136-147. doi:10.1002/jnr.23963
- 729 71. Calipari ES, Juarez B, Morel C, Walker DM, Cahill ME, Ribeiro E, et al. Dopaminergic
- 730 dynamics underlying sex-specific cocaine reward. *Nat Commun.* 2017;8: 13877.
- 731 doi:10.1038/ncomms13877
- 732 72. Kogachi S, Chang L, Alicata D, Cunningham E, Ernst T. Sex differences in impulsivity
- 733 and brain morphometry in methamphetamine users. *Brain Struct Funct.* 2017;222: 215-
- 734 227. doi:10.1007/s00429-016-1212-2
- 735 73. McClung C, Hirsh J. The trace amine tyramine is essential for sensitization to cocaine in

- 736 Drosophila. *Curr Biol.* 1999;9: 853-860.
- 737 74. Andretic R, Chaney S, Hirsh J. Requirement of circadian genes for cocaine sensitization  
738 in Drosophila. *Science.* 1999;285: 1066-1068.
- 739 75. Bainton RJ, Tsai LT, Schwabe T, DeSalvo M, Gaul U, Heberlein U. *moody* encodes two  
740 GPCRs that regulate cocaine behaviors and blood-brain barrier permeability in  
741 Drosophila. *Cell.* 2005;123:145-156.
- 742 76. Heberlein U, Tsai LT, Kapfhamer D, Lasek AW. Drosophila, a genetic model system to  
743 study cocaine-related behaviors: a review with focus on LIM-only proteins.  
744 *Neuropharmacol.* 2009;56 Suppl 1:97-106. doi: 10.1016/j.neuropharm.2008.07.023.
- 745 77. Vanderwerf SM, Buck DC, Wilmarth PA, Sears LM, David LL, Morton DB, Neve KA. Role  
746 for Rab10 in methamphetamine-induced behavior. *PLoS One.* 2015;10: e0136167. doi:  
747 10.1371/journal.pone.0136167
- 748 78. Takaesu, NT, Hyman-Walsh C, Ye Y, Wisotzkey RG, Stinchfield MJ, O'Connor MB, et al.  
749 dSno facilitates baboon signaling in the Drosophila brain by switching the affinity of  
750 Medea away from Mad and toward dSmad2. *Genetics.* 2006;174: 1299-1313. doi:  
751 10.1534/genetics.106.064956
- 752 79. Barrio R, López-Varea A, Casado M, de Celis JF. Characterization of dSnoN and its  
753 relationship to Decapentaplegic signaling in Drosophila. *Dev Biol.* 2007;306: 66-81. doi:  
754 10.1016/j.ydbio.2007.02.039
- 755 80. Iyer EP, Iyer SC, Sullivan L, Wang D, Meduri R, Graybeal LL, et al. Functional genomic  
756 analyses of two morphologically distinct classes of Drosophila sensory neurons: post-  
757 mitotic roles of transcription factors in dendritic patterning. *PLoS ONE.* 2013;8: e72434.  
758 doi: 10.1371/journal.pone.0072434
- 759 81. Bai J, Chiu W, Wang J, Tzeng T, Perrimon N, Hsu J. The cell adhesion molecule  
760 Echinoid defines a new pathway that antagonizes the Drosophila EGF receptor signaling  
761 pathway. *Development.* 2001;128: 591-601.

- 762 82. Rawlins EL, Lovegrove B, Jarman AP. Echinoid facilitates Notch pathway signalling  
763 during *Drosophila* neurogenesis through functional interaction with Delta. *Development*.  
764 2003;130: 6475-6484. doi: 10.1242/dev.00882
- 765 83. Wei SY, Escudero LM, Yu F, Chang LH, Chen LY, Ho YH, et al. Echinoid is a component  
766 of adherens junctions that cooperates with DE-Cadherin to mediate cell adhesion. *Dev*  
767 *Cell*. 2005;8: 493-504. doi: 10.1016/j.devcel.2005.03.015
- 768 84. Nakamura M, Okano H, Blendy JA, Montell C. Musashi, a neural RNA-binding protein  
769 required for *Drosophila* adult external sensory organ development. *Neuron*. 1994;13: 67-  
770 81. doi.org/10.1016/0896-6273(94)90460-X
- 771 85. Han KA, Millar NS, Davis RL. A novel octopamine receptor with preferential expression in  
772 *Drosophila* mushroom bodies. *J Neurosci*. 1998;18: 3650-3658. doi:  
773 <https://doi.org/10.1523/JNEUROSCI.18-10-03650.1998>
- 774 86. Kim YC, Lee HG, Han KA. D1 dopamine receptor dDA1 is required in the mushroom  
775 body neurons for aversive and appetitive learning in *Drosophila*. *J Neurosci*. 2007;27:  
776 7640-7647. doi: 10.1523/JNEUROSCI.1167-07.2007
- 777 87. Lim J, Fernandez AI, Hinojos SJ, Aranda GP, James J, Seong CS, et al. The mushroom  
778 body D1 dopamine receptor controls innate courtship drive. *Genes Brain Behav*.  
779 2018;17: 158-167. doi: 10.1111/gbb.12425
- 780 88. Lebestky T, Chang JS, Dankert H, Zelnik L, Kim YC, Han KA, et al. Two different forms  
781 of arousal in *Drosophila* are oppositely regulated by the dopamine D1 receptor ortholog  
782 DopR via distinct neural circuits. *Neuron* 2009;64: 522-536. doi:  
783 10.1016/j.neuron.2009.09.031
- 784 89. Ma Z, Stork T, Bergles DE, Freeman MR. Neuromodulators signal through astrocytes to  
785 alter neural circuit activity and behaviour. *Nature*. 2016;539: 428-432. doi:  
786 10.1038/nature20145

- 787 90. Garlapow ME, Huang W, Yarboro MT, Peterson KR, Mackay TFC. Quantitative genetics  
788 of food intake in *Drosophila melanogaster*. PLoS One. 2015;10: e0138129. doi:  
789 10.1371/journal.pone.0138129
- 790 91. Antonov AV, Dietmann S, Mewes HW. KEGG spider: interpretation of genomics data in  
791 the context of the global gene metabolic network. Genome Biol. 2008;9: R179.  
792 doi:10.1186/gb-2008-9-12-r179
- 793 92. Zhou S, Morozova TV, Hussain YN, Luoma SE, McCoy L, Yamamoto A, et al. The  
794 genetic basis for variation in sensitivity to lead toxicity in *Drosophila melanogaster*.  
795 Environ Health Perspect. 2016;124: 1062-1070. doi:10.1289/ehp.1510513
- 796 93. Morozova TV, Hussain Y, McCoy LJ, Zhirnov EV, Davis MR, Pray VA, et al. A Cyclin E  
797 centered genetic network contributes to alcohol-induced variation in *Drosophila*  
798 development. G3 (Bethesda). 2018;8: 2643-2653. doi:10.1534/g3.118.200260  
799



800 **Table 1. Analyses of variance of consumption measured over three exposures.** Exposure,  
 801 Sex, Solution, and their interaction are fixed effects, the rest are random. E: Exposure; X: Sex;  
 802 S: Solution; L: DGRP Line;  $\epsilon$ : residual; df: degrees of freedom; MS: Type III mean squares; F: F-  
 803 ratio test; P: P-value;  $\sigma^2$ : variance component estimate; SE: standard error; H2: Broad sense  
 804 heritability. Significant P-values are highlighted in bold font.

805

| Source                    | df   | MS        | F      | P               | $\sigma^2$ (SE) | H <sup>2</sup> |
|---------------------------|------|-----------|--------|-----------------|-----------------|----------------|
| <b>A. Cocaine</b>         |      |           |        |                 |                 |                |
| L                         | 45   | 9822      | 4.55   | <b>2.44E-08</b> | 63.86 (17.55)   |                |
| E                         | 2    | 12579     | 14.85  | <b>2.67E-06</b> | Fixed           |                |
| S                         | 1    | 15088     | 16.21  | <b>2.15E-04</b> | Fixed           |                |
| X                         | 1    | 223732    | 169.93 | <b>6.95E-17</b> | Fixed           |                |
| L×E                       | 90   | 846.8     | 1.57   | <b>3.09E-02</b> | 7.71 (4.00)     |                |
| L×S                       | 45   | 930.9     | 1.41   | 1.08E-01        | 4.52 (3.85)     |                |
| E×S                       | 2    | 812.9     | 1.53   | 2.23E-01        | Fixed           |                |
| L×X                       | 45   | 1317      | 3.28   | <b>4.00E-04</b> | 15.24 (4.93)    | 0.29           |
| E×X                       | 2    | 3530      | 12.83  | <b>1.25E-05</b> | Fixed           |                |
| S×X                       | 1    | 955.5     | 2.41   | 1.28E-01        | Fixed           |                |
| L×E×S                     | 90   | 533       | 1.98   | <b>7.00E-04</b> | 13.16 (4.45)    |                |
| L×E×X                     | 90   | 275.1     | 1.02   | 4.63E-01        | 0.27 (2.87)     |                |
| L×S×X                     | 45   | 396.7     | 1.47   | 6.13E-02        | 4.23 (3.09)     |                |
| E×S×X                     | 2    | 917.1     | 3.4    | <b>3.77E-02</b> | Fixed           |                |
| L×E×S×X                   | 90   | 269.8     | 1.01   | 4.56E-01        | 0.25 (4.06)     |                |
| $\epsilon$                | 4968 | 267.3     |        |                 | 267.28 (5.36)   |                |
| <b>B. Methamphetamine</b> |      |           |        |                 |                 |                |
| L                         | 45   | 7426.77   | 3.27   | <b>2.41E-06</b> | 42.71 (13.40)   |                |
| E                         | 2    | 21687.00  | 17.33  | <b>3.00E-07</b> | Fixed           |                |
| S                         | 1    | 31338.00  | 37.3   | <b>2.16E-07</b> | Fixed           |                |
| X                         | 1    | 179509.00 | 162.17 | <b>1.60E-16</b> | Fixed           |                |
| L×E                       | 90   | 1251.40   | 2.32   | <b>8.72E-05</b> | 18.48 (5.08)    |                |
| L×S                       | 45   | 840.12    | 1.34   | 1.37E-01        | 4.03 (3.43)     |                |
| E×S                       | 2    | 208.98    | 0.47   | 6.29E-01        | Fixed           |                |
| L×X                       | 45   | 1106.92   | 2.32   | <b>2.30E-03</b> | 10.98 (4.18)    | 0.28           |
| E×X                       | 2    | 3333.61   | 11.16  | <b>4.68E-05</b> | Fixed           |                |
| S×X                       | 1    | 806.85    | 2.1    | 1.54E-01        | Fixed           |                |
| L×E×S                     | 90   | 448.30    | 2.17   | <b>2.00E-04</b> | 10.69 (3.35)    |                |
| L×E×X                     | 90   | 298.62    | 1.44   | <b>4.18E-02</b> | 3.20 (2.24)     |                |
| L×S×X                     | 45   | 384.45    | 1.86   | <b>6.50E-03</b> | 5.00 (2.71)     |                |
| E×S×X                     | 2    | 880.99    | 4.26   | <b>1.71E-02</b> | Fixed           |                |
| L×E×S×X                   | 90   | 206.94    | 0.88   | 7.82E-01        | 0 (0)           |                |
| $\epsilon$                | 4968 | 234.92    |        |                 | 243.42 (4.66)   |                |

809 **Figure Captions**

810

811 **Fig. 1. Consumption and preference assay.** (A) Cartoon illustrating the four capillary CAFÉ  
812 assay. Each of the three exposures consists of an 18 hour feeding trial with sucrose or drug +  
813 sucrose, followed by 6 hours recovery with standard culture medium. (B) Positions of capillaries  
814 with the two solutions (indicated by red and yellow).

815

816 **Fig. 2. Variation in drug consumption among 46 DGRP lines.** (A) Initial exposure. Lines are  
817 from lowest to highest consumption in females. (B) Third exposure. The line order is the same  
818 as in (A). (C) Change in consumption between exposures 3 and 1. Positive values indicate  
819 increased drug consumption in Exposure 3. The line order is the same as in (A). Pink denotes  
820 females, blue indicates males, and purple is overlap of both sexes. Error bars are  $\pm 1SD$ .

821

822 **Fig. 3. Significant genetic interaction network of genes identified in the GWA analyses for**  
823 **all cocaine and methamphetamine related traits combined.** Borders indicate the strength of  
824 the evidence for a human ortholog. Black: DIOPT score  $< 3$ ; Blue: DIOPT score 3-6; Green:  
825 DIOPT score 7-9; Orange: DIOPT score 10-12; Red: DIOPT score 13-15. Grey boxes have  
826 effects on at least one drug-seeking behavior from RNAi knockdown of gene expression.

827

828 **Fig. 4. Differences in cocaine preference and change in cocaine preference between the**  
829 **third and first exposures between RNAi and control genotypes.** (A) Female preference. (B)  
830 Male preference. (C) Female change of preference. (D) Male change of preference. Red, black,  
831 blue, and green bars denote *elav-GAL4*, *repo-GAL4*, *201Y-GAL4* and *TH-GAL4* drivers,  
832 respectively. Asterisks represent significant  $L \times S$  terms (A, B) or significant  $L \times S \times E$  terms from  
833 the full ANOVA models. Exact  $P$ -values are given in Table S11.

834

835 **Fig. 5. Differences in methamphetamine preference and change in methamphetamine**  
836 **preference between the third and first exposures between RNAi and control genotypes.**  
837 (A) Female preference. (B) Male preference. (C) Female change of preference. (D) Male change  
838 of preference. Red, black, blue, and green bars denote *elav-GAL4*, *repo-GAL4*, *201Y-GAL4* and  
839 *TH-GAL4* drivers, respectively. Asterisks represent significant  $L \times S$  terms (A, B) or significant  
840  $L \times S \times E$  terms from the full ANOVA models. Exact  $P$ -values are given in Table S12.

841

#### 842 **Supplementary Table Captions**

843

844 **Table S1. DGRP raw consumption data.** (A) Cocaine experiment. (B) Methamphetamine  
845 experiment. F: female; M: male.

846

847 **Table S2. Analyses of variance of consumption, change in consumption, preference and**  
848 **change in preference of cocaine and methamphetamine.** Exposure, Sex, Solution, and their  
849 interaction are fixed effects, the rest are random. Mixed model three-way factorial ANOVAs are  
850 given for males and females, as well as reduced models by Exposure, Sex, and Solution.  $E$ :  
851 Exposure;  $X$ : Sex;  $S$ : Solution;  $L$ : DGRP Line; df: degrees of freedom; MS: Type III mean  
852 squares;  $F$ : F-ratio test;  $P$ :  $P$ -value;  $\sigma^2$ : variance component estimate; SE: standard error;  $H^2$ :  
853 Broad sense heritability. Significant  $P$ -values are shown in red font. (A) Cocaine experiment. (B)  
854 Methamphetamine experiment.

855

856 **Table S3. DGRP line means for all traits.** (A) Cocaine experiment. (B) Methamphetamine  
857 experiment. Means are given in mm; 1 mm = 0.067  $\mu$ l.

858

859 **Table S4. Genetic and phenotypic correlations between traits.** (A) Cross-sex, cross-  
860 exposure and cross-solution genetic correlations. Significant  $P$ -values are indicated in red font.

861 (B) Pair-wise phenotypic correlations. Entries in the cells are the correlation coefficients and the  
862 cell color denotes the  $P$ -value. Red:  $P < 0.0001$ ; orange:  $P < 0.001$ ; yellow:  $P < 0.01$ ; green:  $P <$   
863  $0.05$ ; white:  $P > 0.05$ .

864

865 **Table S5. Results of genome wide association (GWA) analyses for consumption**

866 **behaviors.** (A) Top variants ( $P < 5 \times 10^{-5}$ ) and associated genes for each trait. (B) Variants and  
867 genes for the cocaine traits, the methamphetamine traits, and variants and genes overlapping  
868 between the two experiments. (C) Pathway and gene ontology enrichment analysis for the  
869 cocaine GWA analyses. (D) Pathway and gene ontology enrichment analysis for the  
870 methamphetamine GWA analyses.

871

872 **Table S6. DGRP candidate genes and human orthologs.** The references indicate which of  
873 the human orthologs have been associated with addictive phenotypes.

874

875 **Table S7. A significant genetic interaction network with no missing genes.** (A) Genes in  
876 network. (B) Pathway and gene ontology enrichment analysis.

877

878 **Table S8. Raw cocaine and sucrose consumption data for RNAi and control genotypes.**

879 (A) *Ubi156-GAL4*. (B) *elav-GAL4*. (C) *repo-GAL4*. (D) *201Y-GAL4*. (E) *TH-GAL4*. Data are  
880 given in mm; 1 mm = 0.067  $\mu$ l.

881

882 **Table S9. Raw methamphetamine and sucrose consumption data for RNAi and control**  
883 **genotypes.** (A) *Ubi156-GAL4*. (B) *elav-GAL4*. (C) *repo-GAL4*. (D) *201Y-GAL4*. (E) *TH-GAL4*.

884 Data are given in mm; 1 mm = 0.067  $\mu$ l.

885

886 **Table S10. Analyses of variance of consumption, change in consumption, preference and**

887 **change in preference of cocaine and sucrose in RNAi lines and their controls.** Fixed effect  
888 three-way factorial ANOVAs are given for males and females as well as reduced models by  
889 Exposure and Solution. E: Exposure; S: Solution; L: RNAi or control genotype; df: degrees of  
890 freedom; MS: Type III mean squares; F: F-ratio test; *P*: *P*-value. Significant *P*-values are shown  
891 in red font. (A) *Ubi156-GAL4*. (B) *elav-GAL4*. (C) *repo-GAL4*. (D) *201Y-GAL4*. (E) *TH-GAL4*.

892

893 **Table S11. Analyses of variance of consumption, change in consumption, preference and**  
894 **change in preference of methamphetamine and sucrose in RNAi lines and their controls.**

895 Fixed effect three-way factorial ANOVAs are given for males and females as well as reduced  
896 models by Exposure and Solution. E: Exposure; S: Solution; L: RNAi or control genotype; df:  
897 degrees of freedom; MS: Type III mean squares; F: F-ratio test; *P*: *P*-value. Significant *P*-values  
898 are shown in red font. (A) *Ubi156-GAL4*. (B) *elav-GAL4*. (C) *repo-GAL4*. (D) *201Y-GAL4*. (E)  
899 *TH-GAL4*.

900

901 **Table S12. Drosophila lines used in this study.** (A) DGRP lines. (B) RNAi lines and control  
902 genotypes. (C) *GAL4* driver lines.

903

904 **Supplementary Fig. Captions**

905

906 **Fig. S1. *P*-value summary from three-way ANOVA models of consumption for *UAS-RNAi***  
907 **and control genotypes of candidate genes crossed to a weak ubiquitous *GAL4* driver**  
908 **(*Ubi156-GAL4*).** Red: *P* < 0.0001; orange: *P* < 0.001; yellow: *P* < 0.01; green: *P* < 0.05; white: *P*  
909 > 0.05.

910

911 **Fig. S2. Differences between *Ubi156-GAL4* RNAi and control genotypes for 34 candidate**  
912 **genes.** (A) Cocaine preference, females. (B) Cocaine preference, males. (C) Change in cocaine

913 preference between third and first exposures, females. (D) Change in cocaine preference  
914 between third and first exposures, males. Asterisks represent significant  $L \times S$  terms (A, B) or  
915 significant  $L \times S \times E$  terms from the full ANOVA models. Exact  $P$ -values are given in Table S11.

916

917 **Fig. S3. Differences between *Ubi156-GAL4* RNAi and control genotypes for 34 candidate**

918 **genes.** (A) Methamphetamine preference, females. (B) Methamphetamine preference, males.

919 (C) Change in methamphetamine preference between third and first exposures, females. (D)

920 Change in methamphetamine preference between third and first exposures, males. Asterisks

921 represent significant  $L \times S$  terms (A, B) or significant  $L \times S \times E$  terms from the full ANOVA models.

922 Exact  $P$ -values are given in Table S12.

923

924 **Fig. S4.  $P$ -value summary from three-way ANOVA models of consumption for *UAS-RNAi***

925 **and control genotypes of candidate genes crossed to neuronal (*elav-GAL4*) and glial**

926 **(*repo-GAL4*) *GAL4* drivers.** Red:  $P < 0.0001$ ; orange:  $P < 0.001$ ; yellow:  $P < 0.01$ ; green:  $P <$

927  $0.05$ ; white:  $P > 0.05$ .

928

929 **Fig. S5.  $P$ -value summary from three-way ANOVA models of consumption for *UAS-RNAi***

930 **and control genotypes of candidate genes crossed to mushroom body (*201Y-GAL4*) and**

931 **dopaminergic (*TH-GAL4*) *GAL4* drivers.** Red:  $P < 0.0001$ ; orange:  $P < 0.001$ ; yellow:  $P <$

932  $0.01$ ; green:  $P < 0.05$ ; white:  $P > 0.05$ .

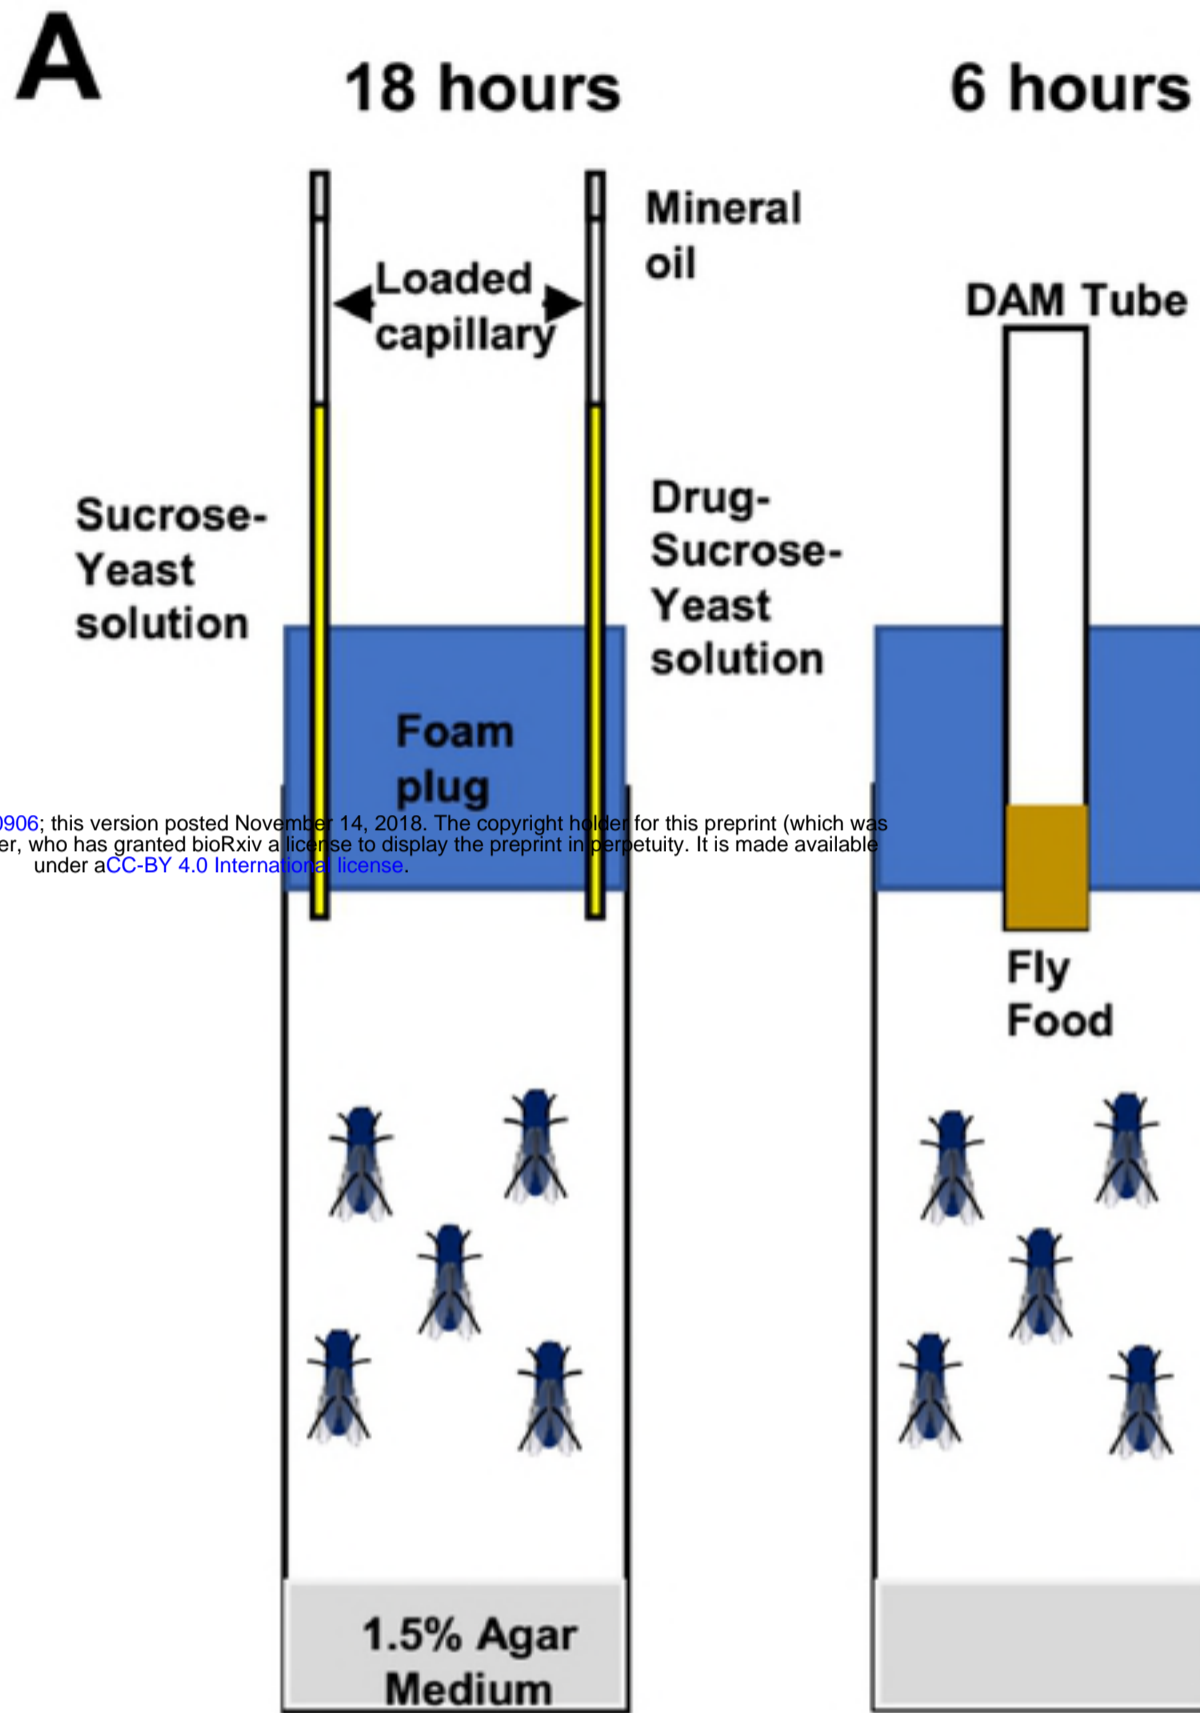

bioRxiv preprint doi: <https://doi.org/10.1101/470906>; this version posted November 14, 2018. The copyright holder for this preprint (which was not certified by peer review) is the author/funder, who has granted bioRxiv a license to display the preprint in perpetuity. It is made available under aCC-BY 4.0 International license.

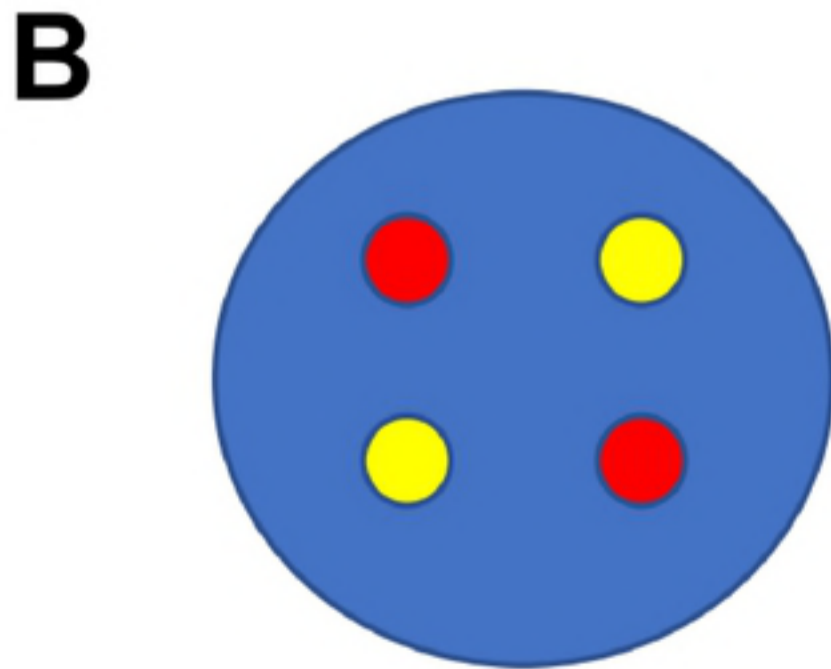

Figure 1



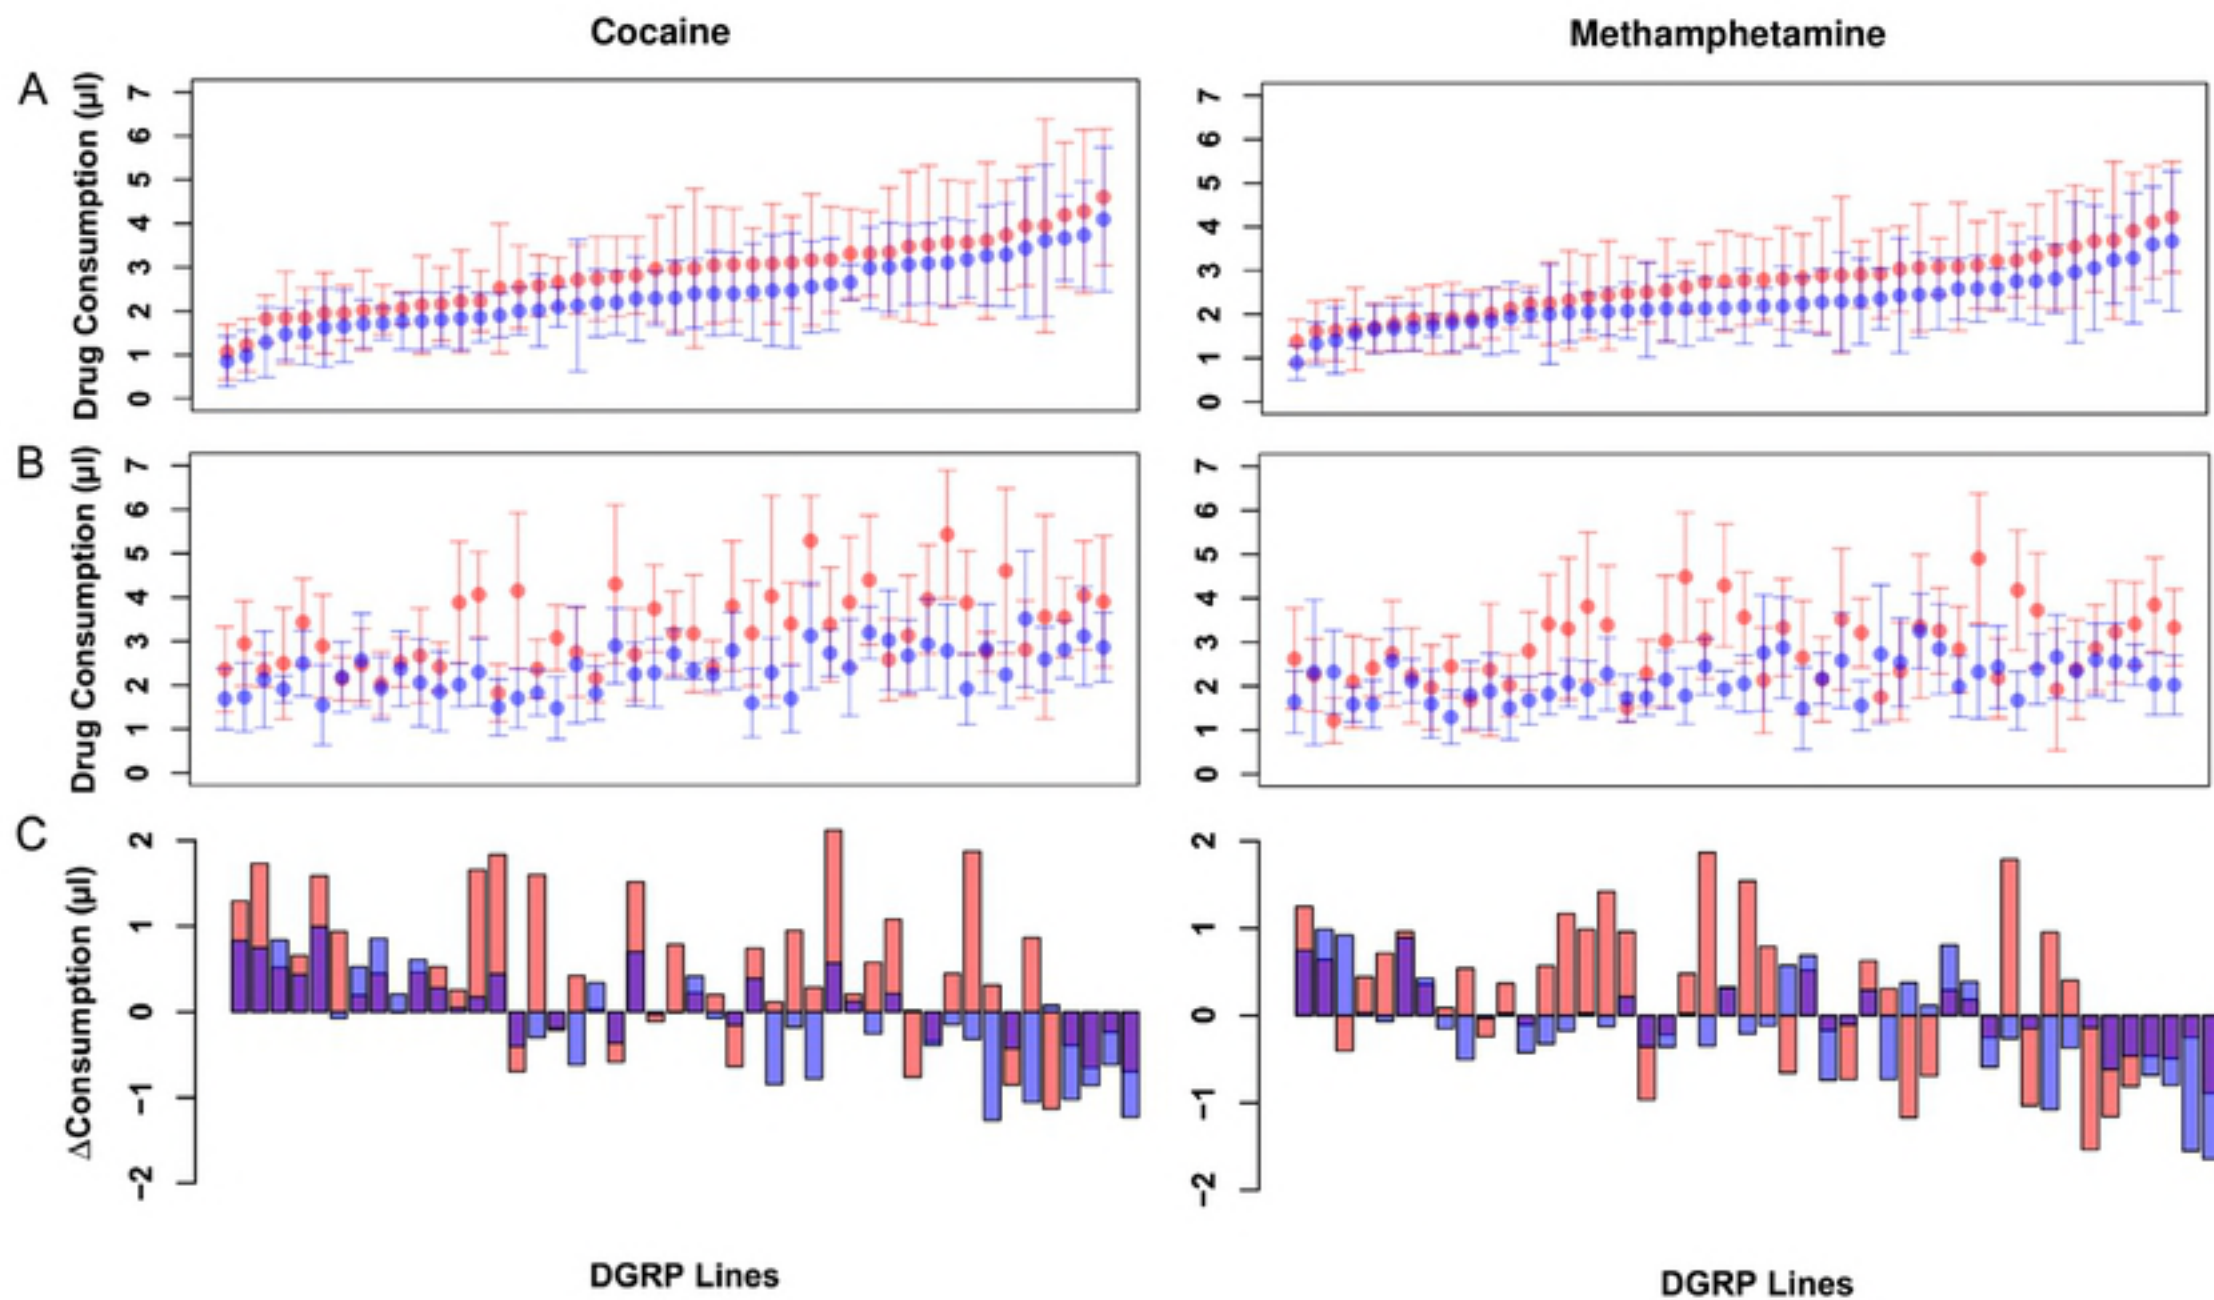

Figure 2



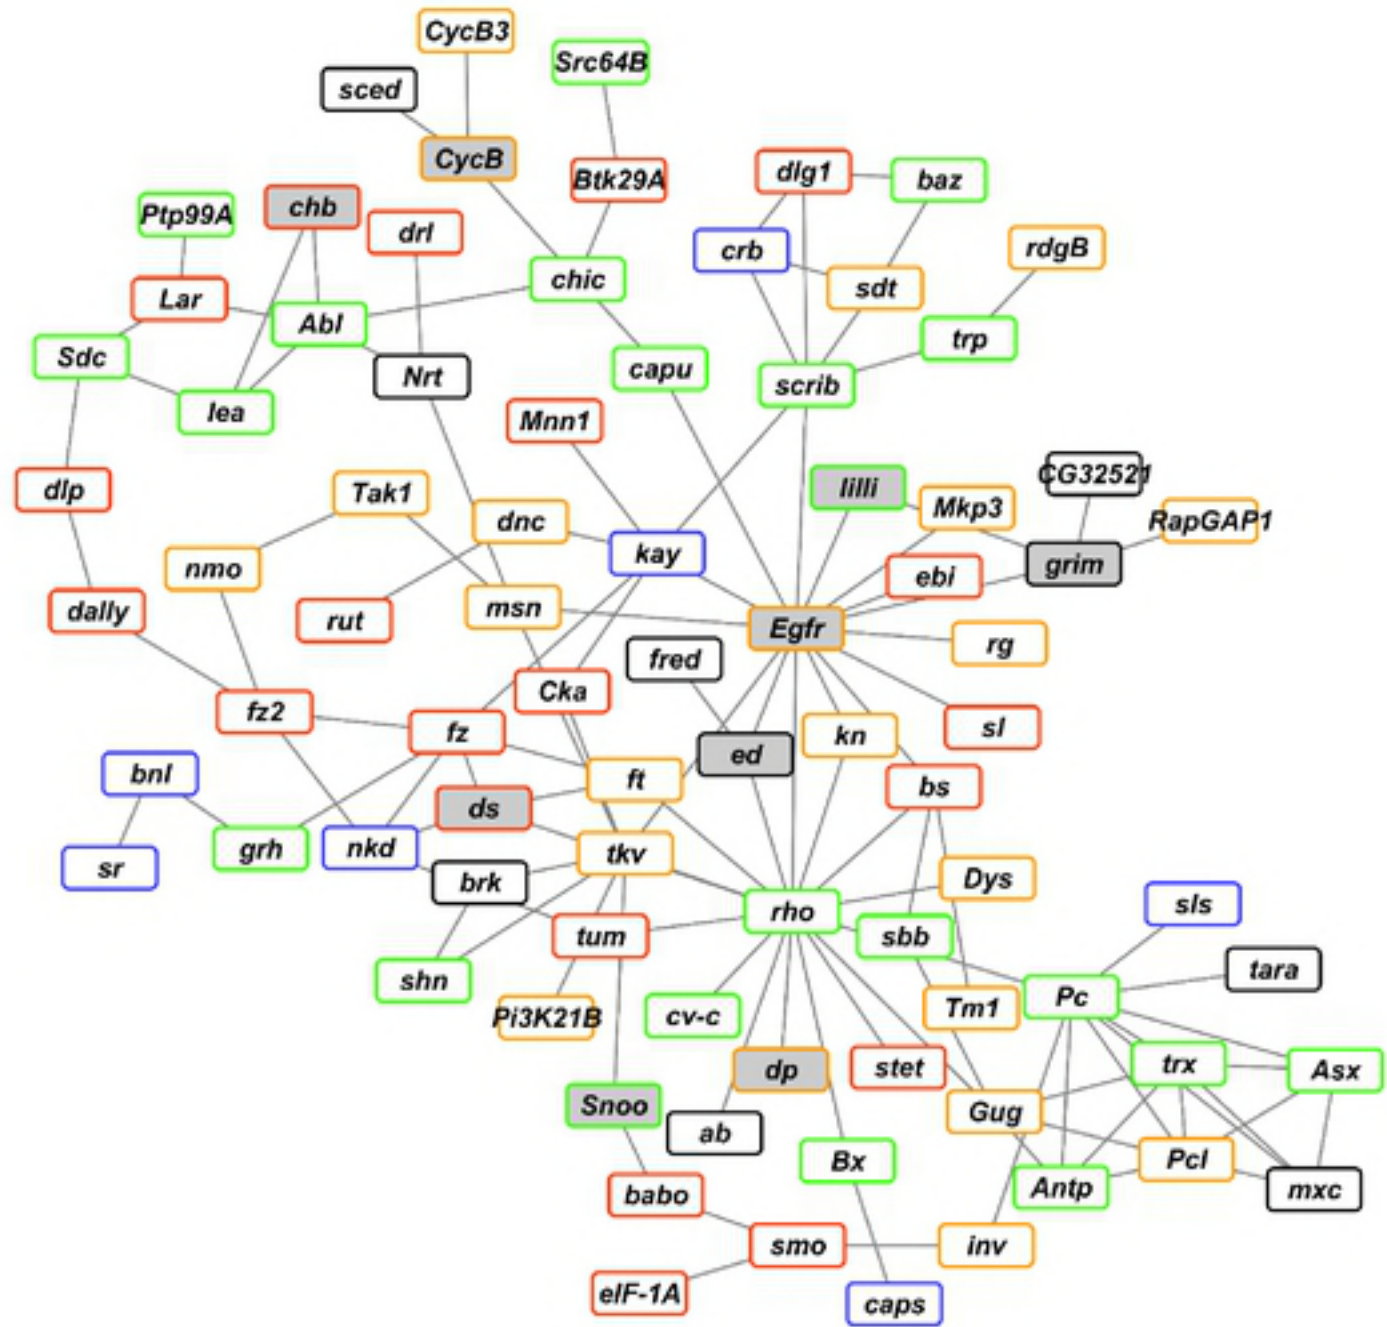

Figure 3

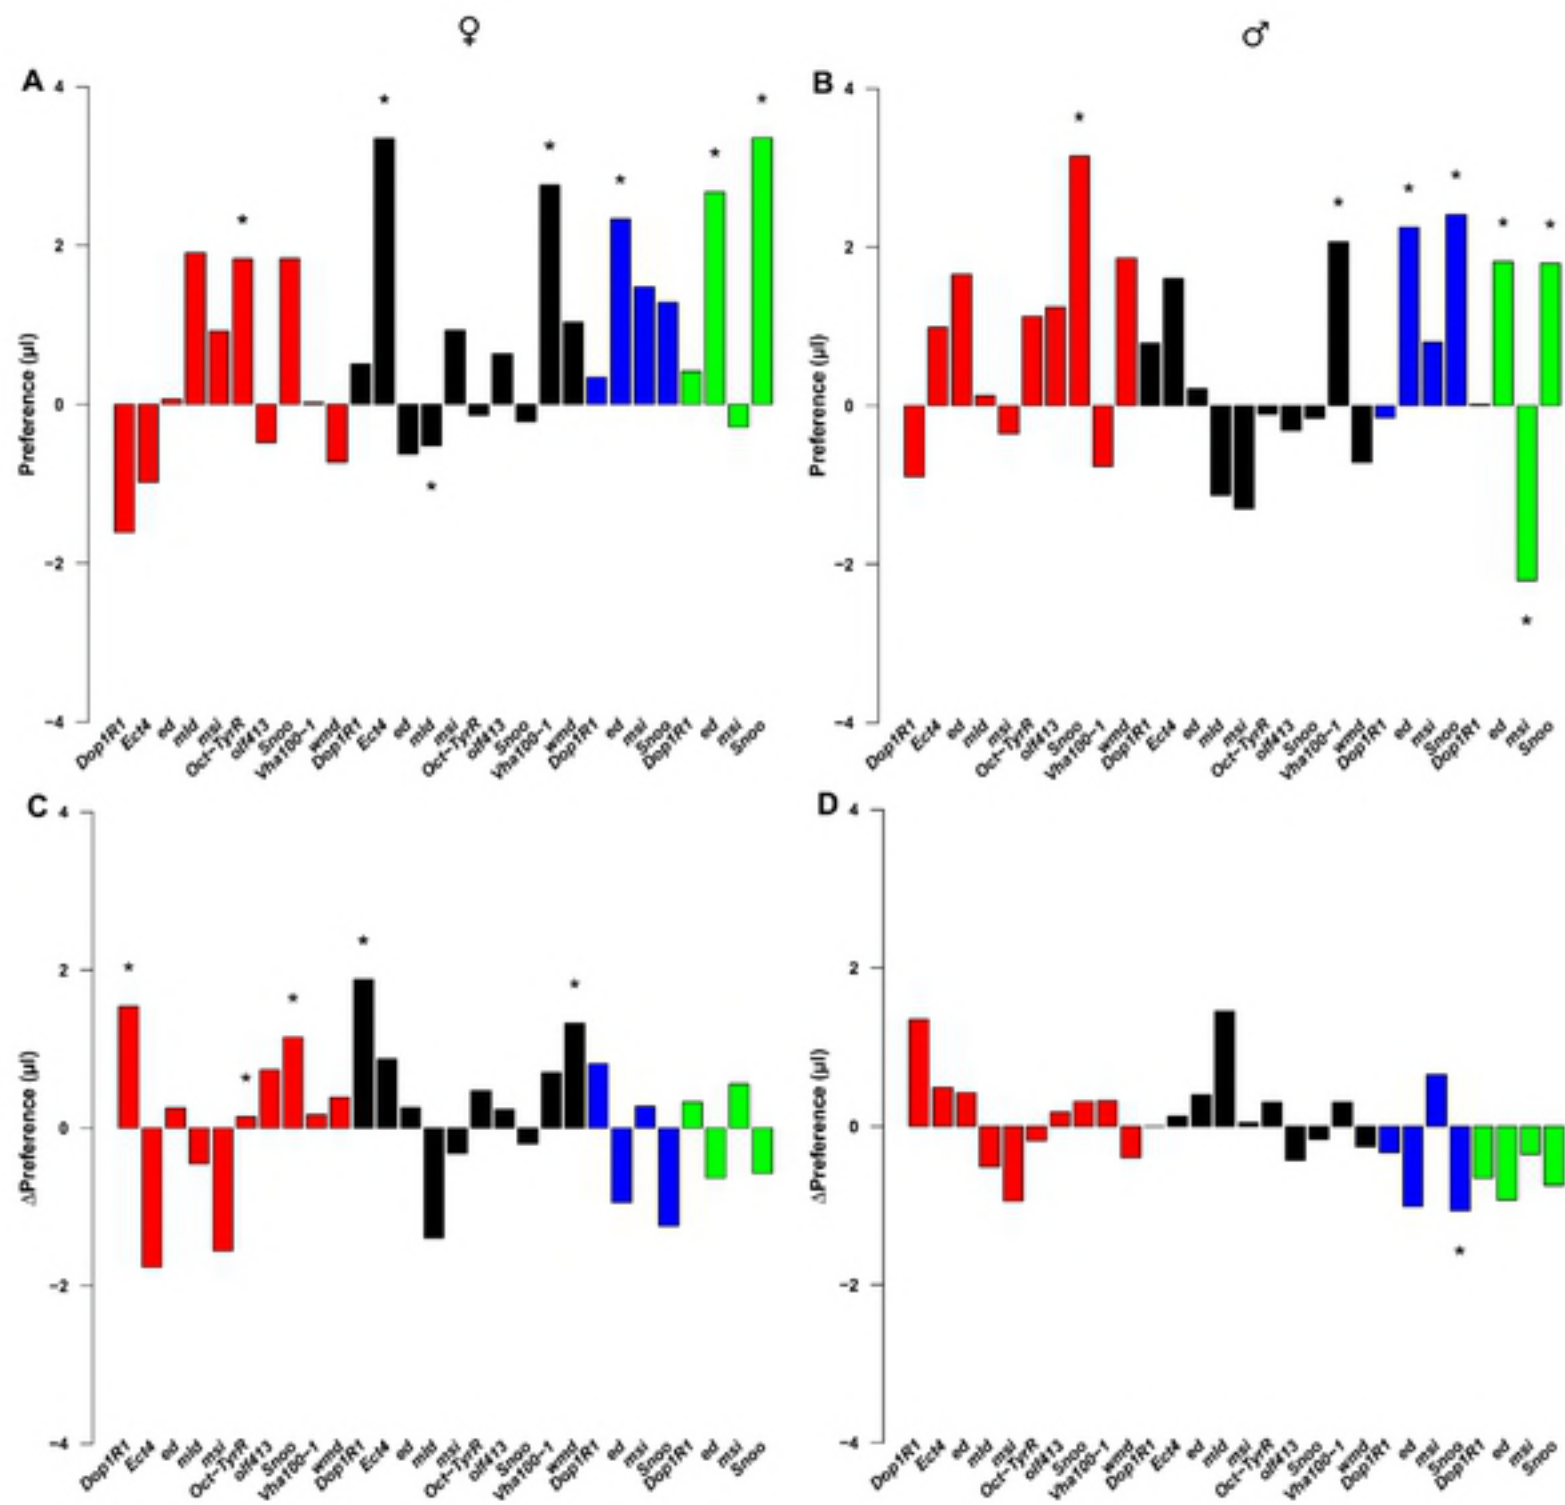

Figure 4

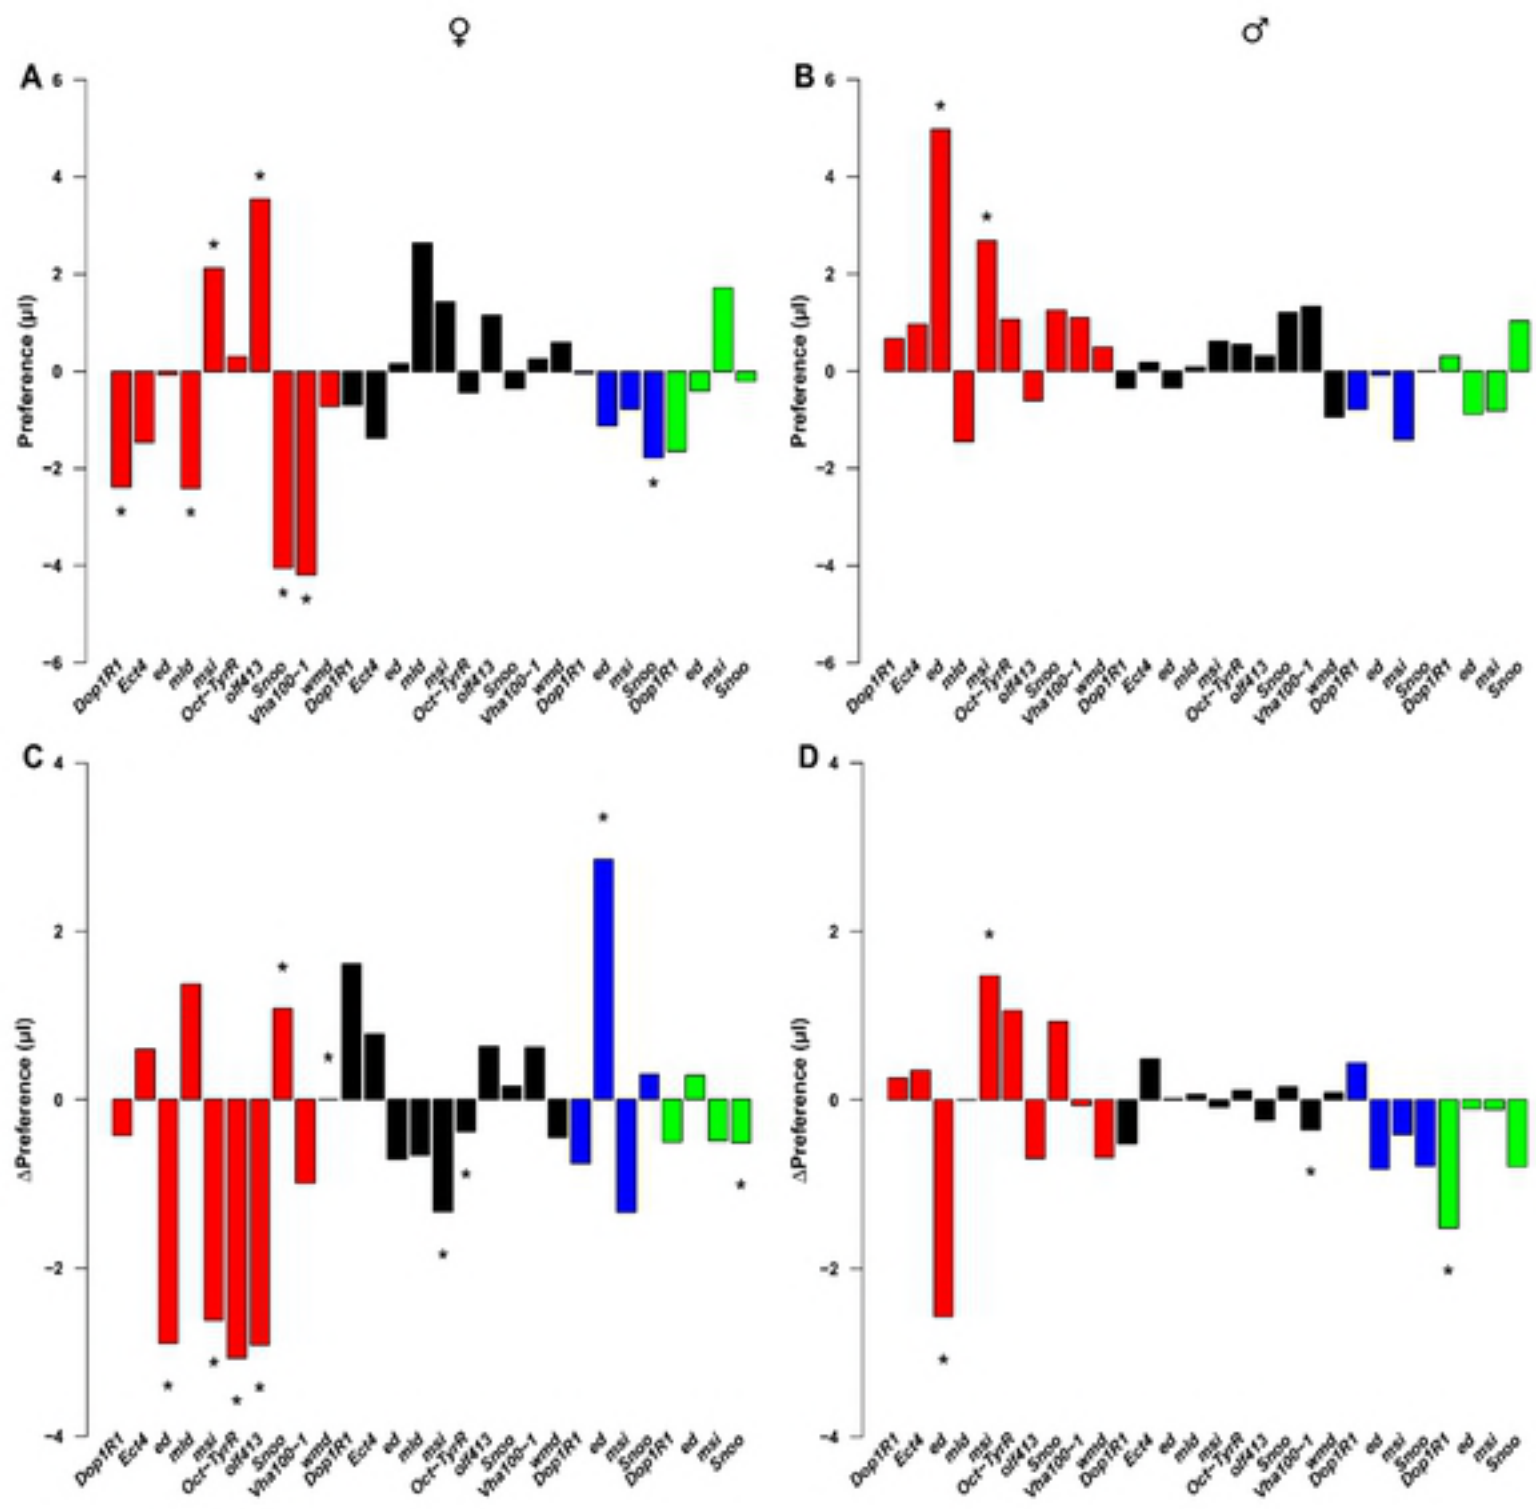

Figure 5
